# Supplementary material for: Design, synthesis, and herbicidal activity of indole-3-carboxylic acid derivatives as potential transport inhibitor response 1 antagonists
Source: PubMed Central journal article supplement (PMC9360422; doi:10.3389/fchem.2022.975267), 2022-07-26
Supplement: DataSheet1.pdf [file DataSheet1.pdf]

## Supplementary Material

### Contents

Copes of  $^1\text{H}$  NMR and  $^{13}\text{C}$  NMR spectra of the synthetic compounds **9a~9c**, **10a~10i**, **12a~12b**, **13a~13d**, and **14a~14f**

### 1 Supplementary Tables and Figures

#### 1.1 Supplementary Figures

Copes of  $^1\text{H}$  NMR and  $^{13}\text{C}$  NMR spectra of the synthetic compounds **9a~9c**, **10a~10i**, **12a~12b**, **13a~13d**, and **14a~14f**.

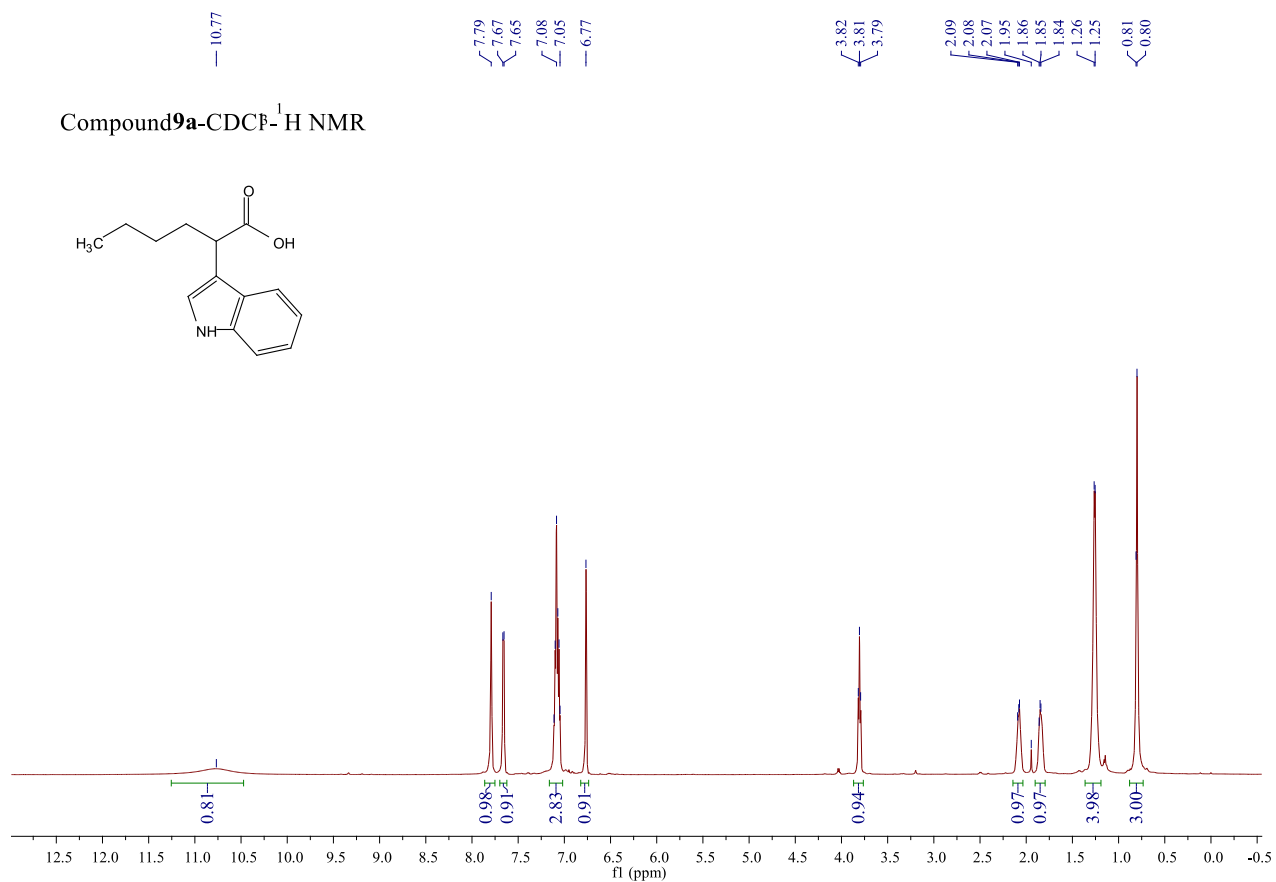

$^1\text{H}$  NMR spectrum of compound **9a**

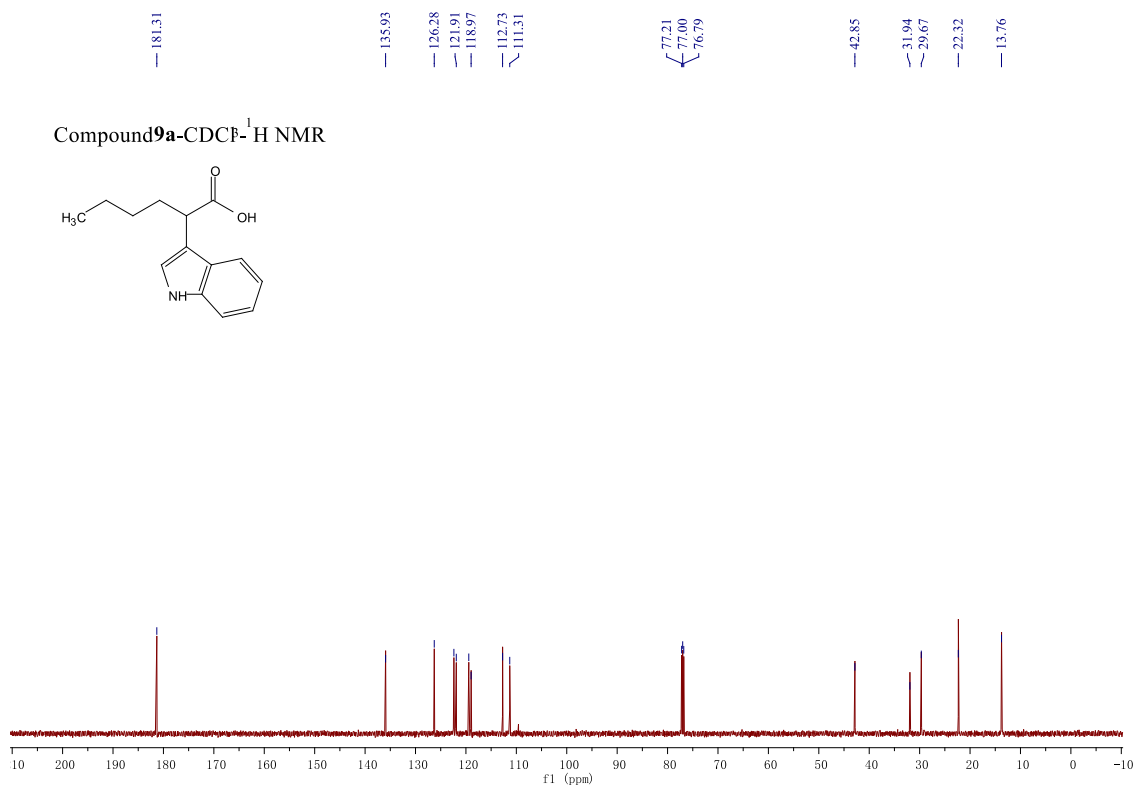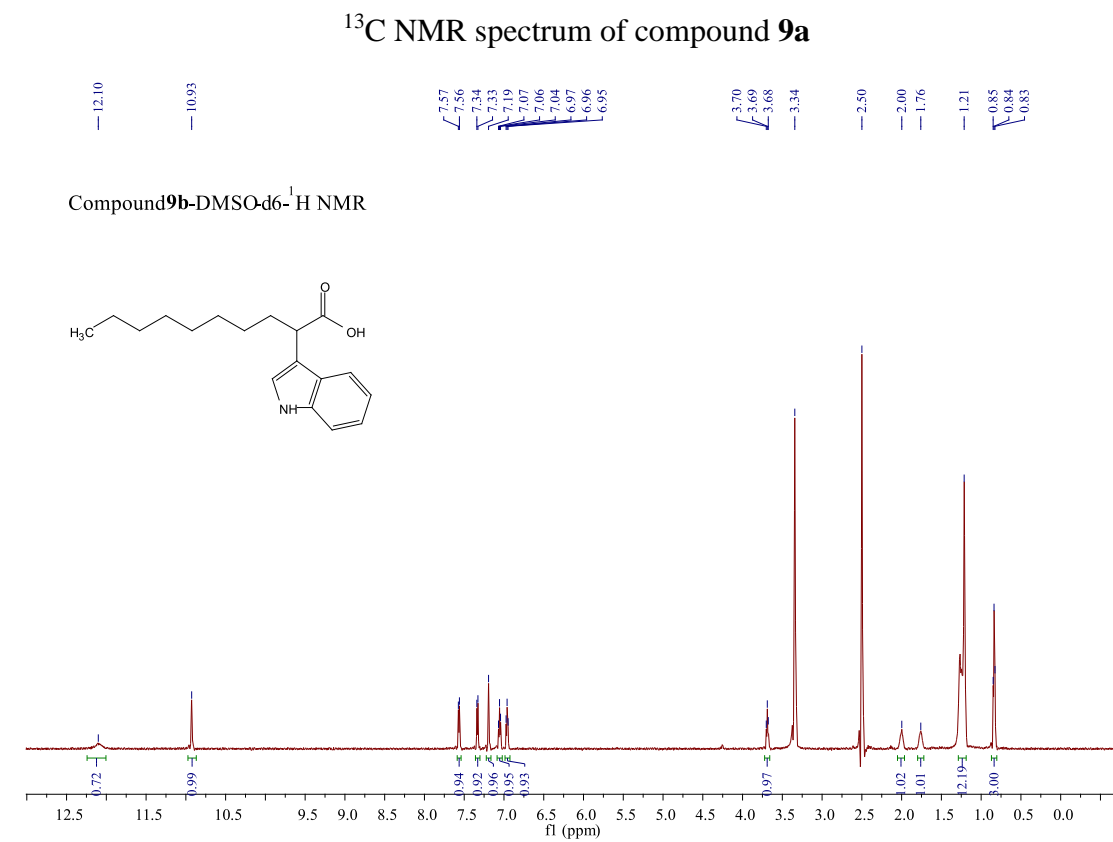<sup>1</sup>H NMR spectrum of compound **9b**

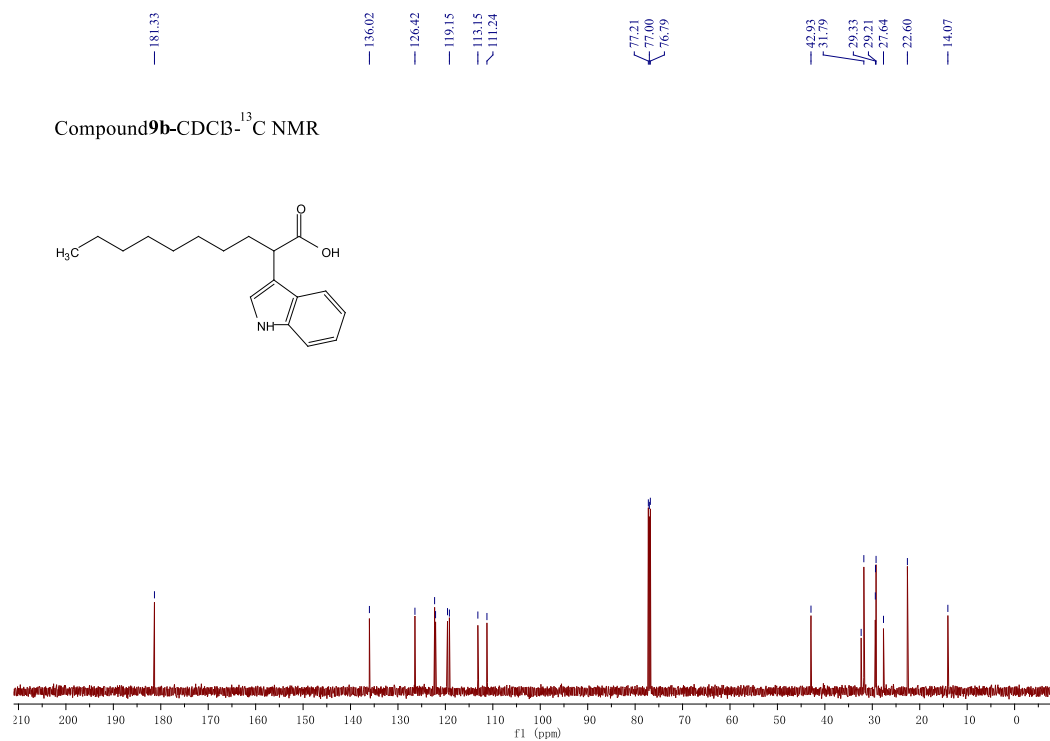

<sup>13</sup>C NMR spectrum of compound **9b**

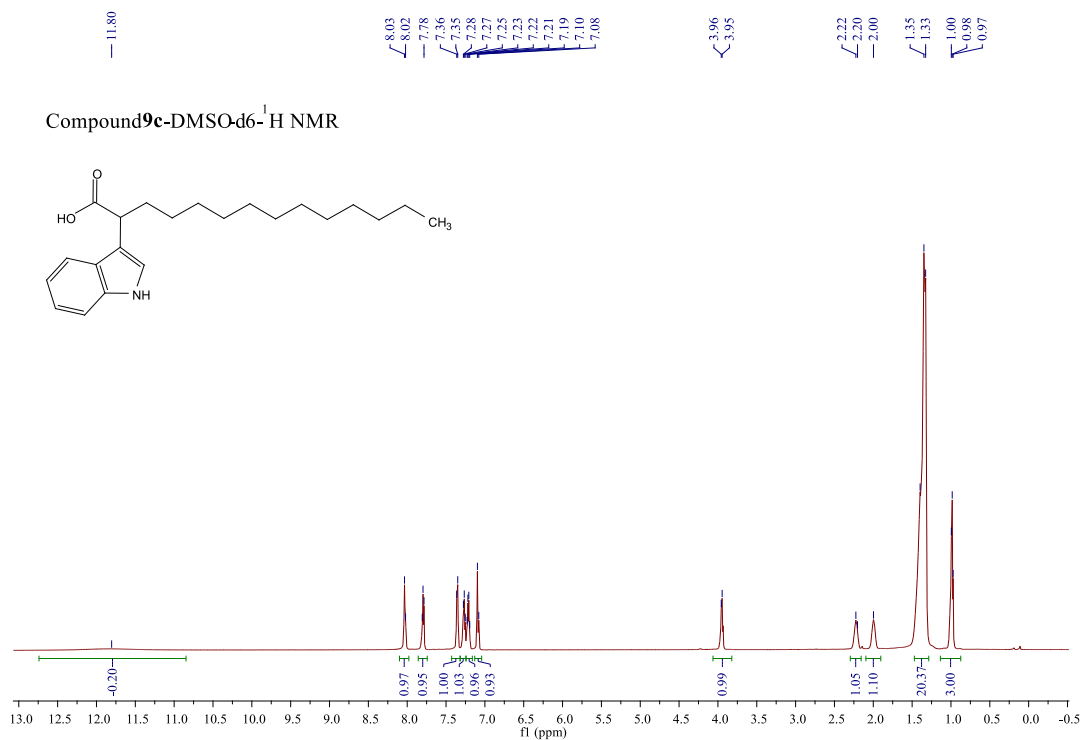

<sup>1</sup>H NMR spectrum of compound **9c**

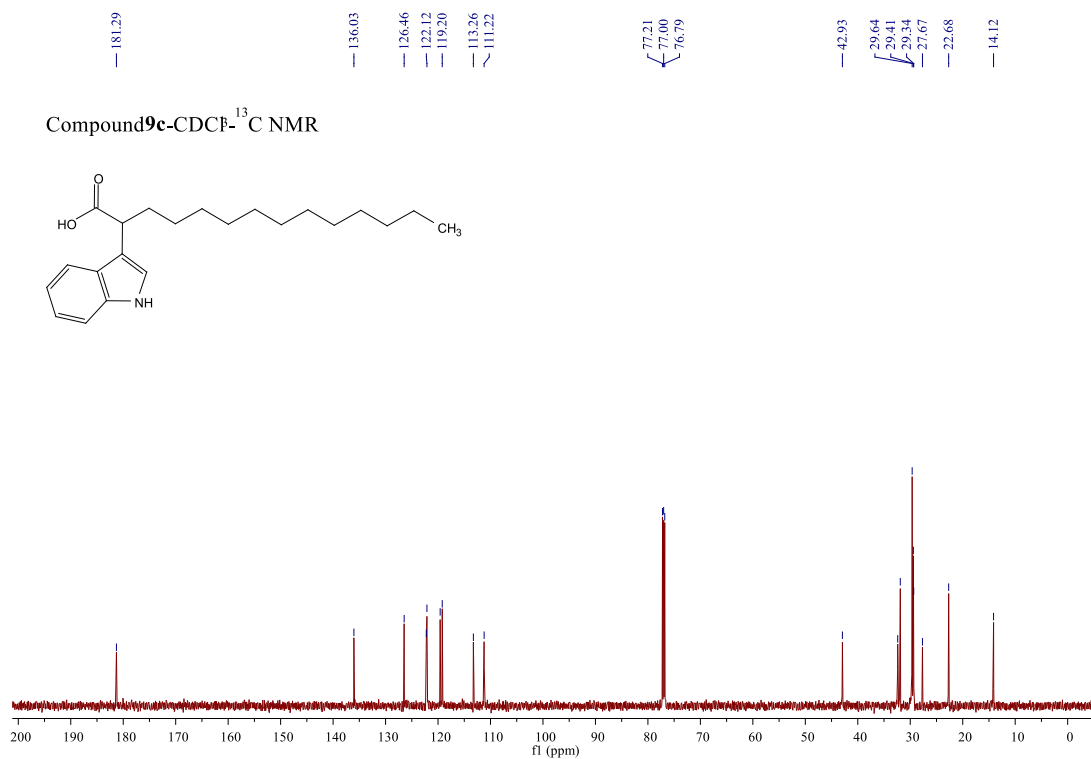<sup>13</sup>C NMR spectrum of compound **9c**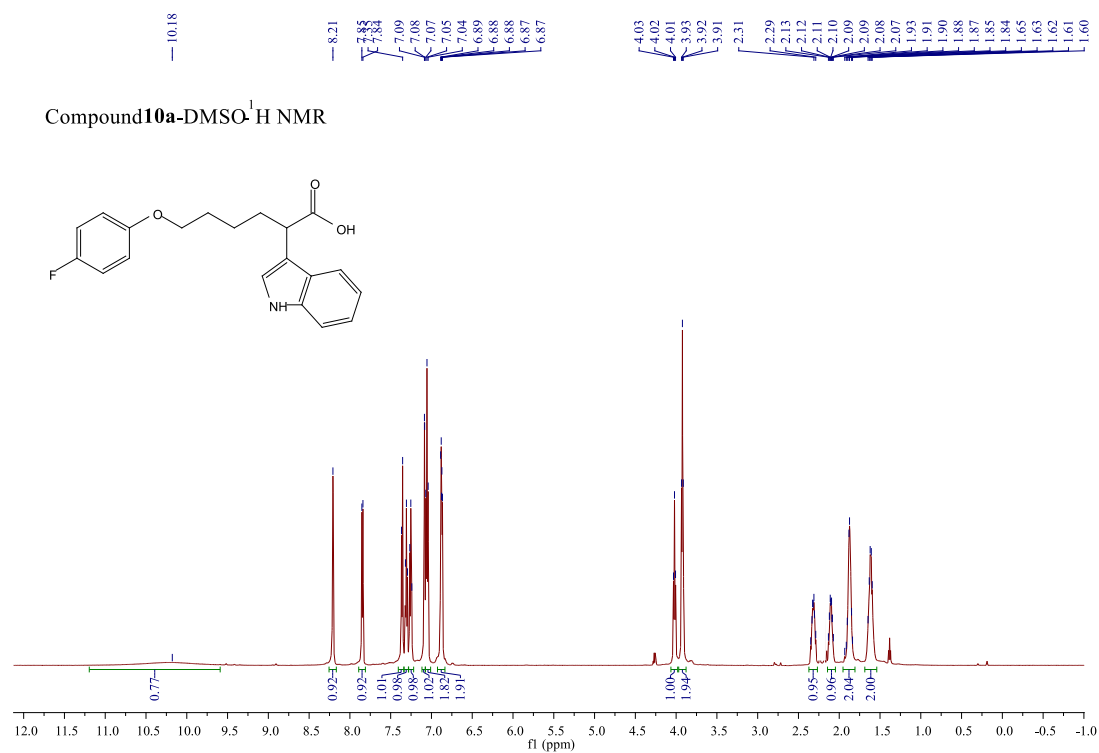<sup>1</sup>H NMR spectrum of compound **10a**



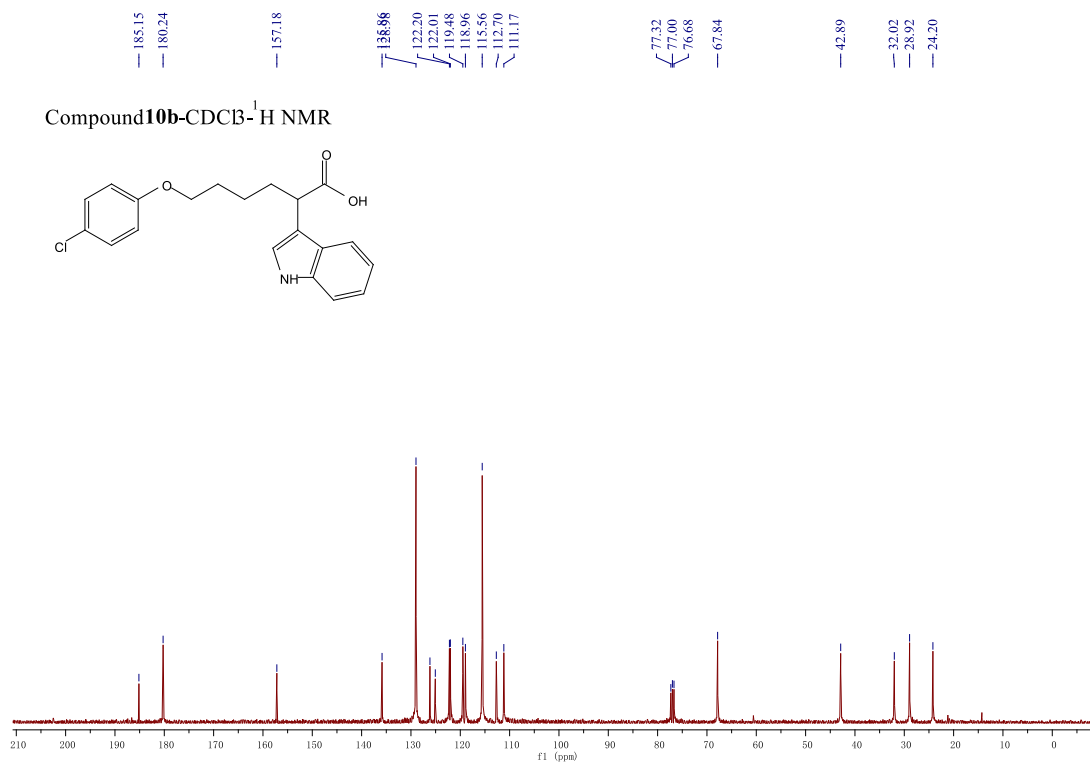 $^{13}\text{C}$  NMR spectrum of compound **10b**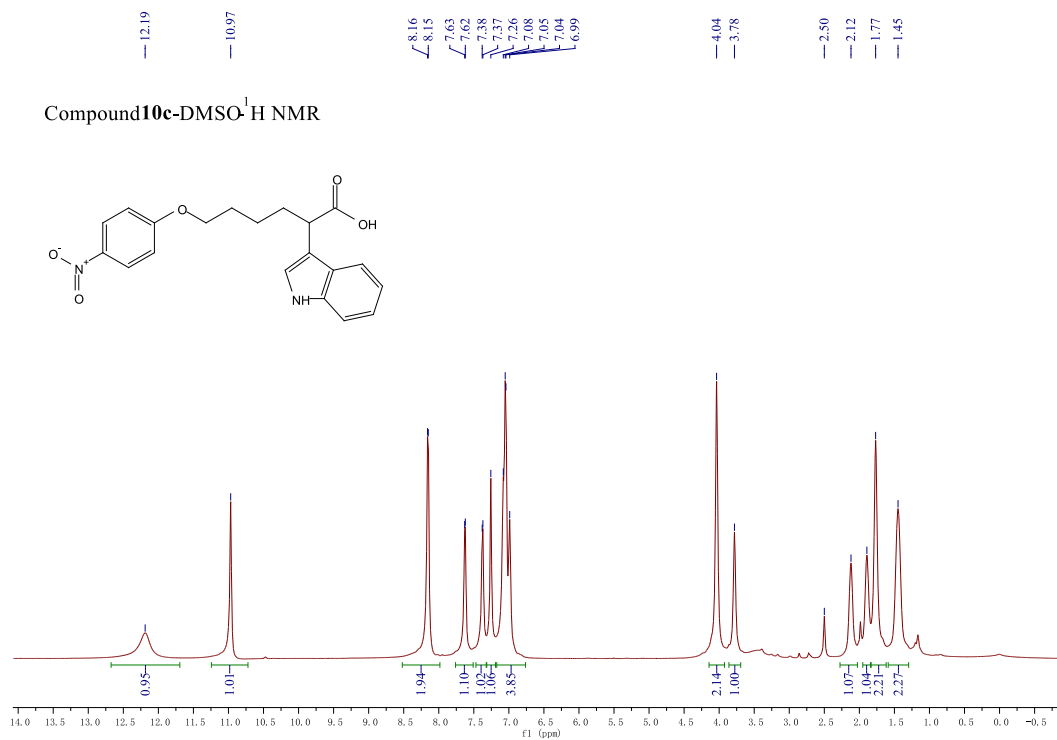 $^1\text{H}$  NMR spectrum of compound **10c**

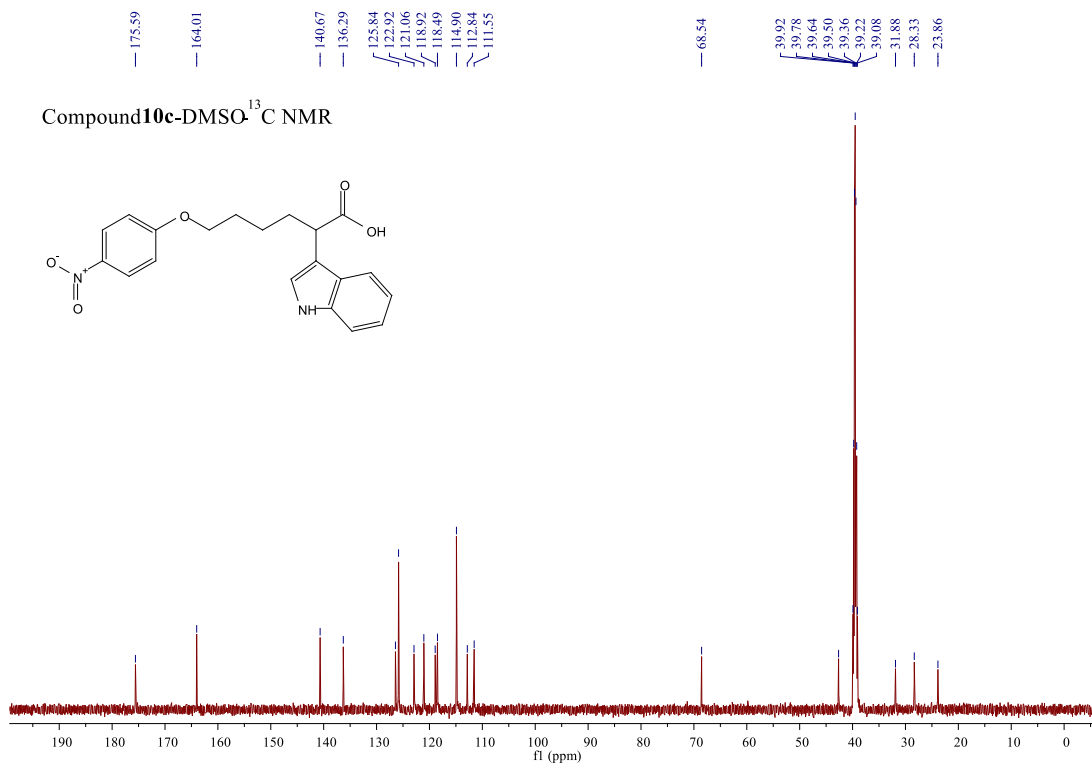

$^{13}\text{C}$  NMR spectrum of compound 10c

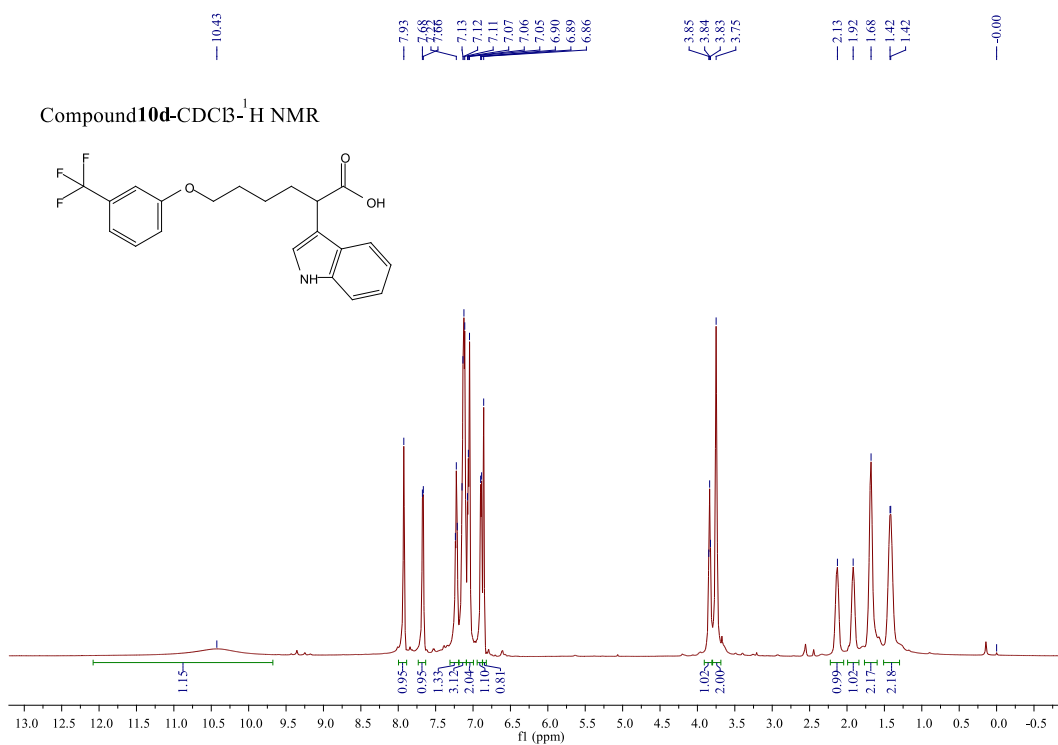

$^1\text{H}$  NMR spectrum of compound 10d

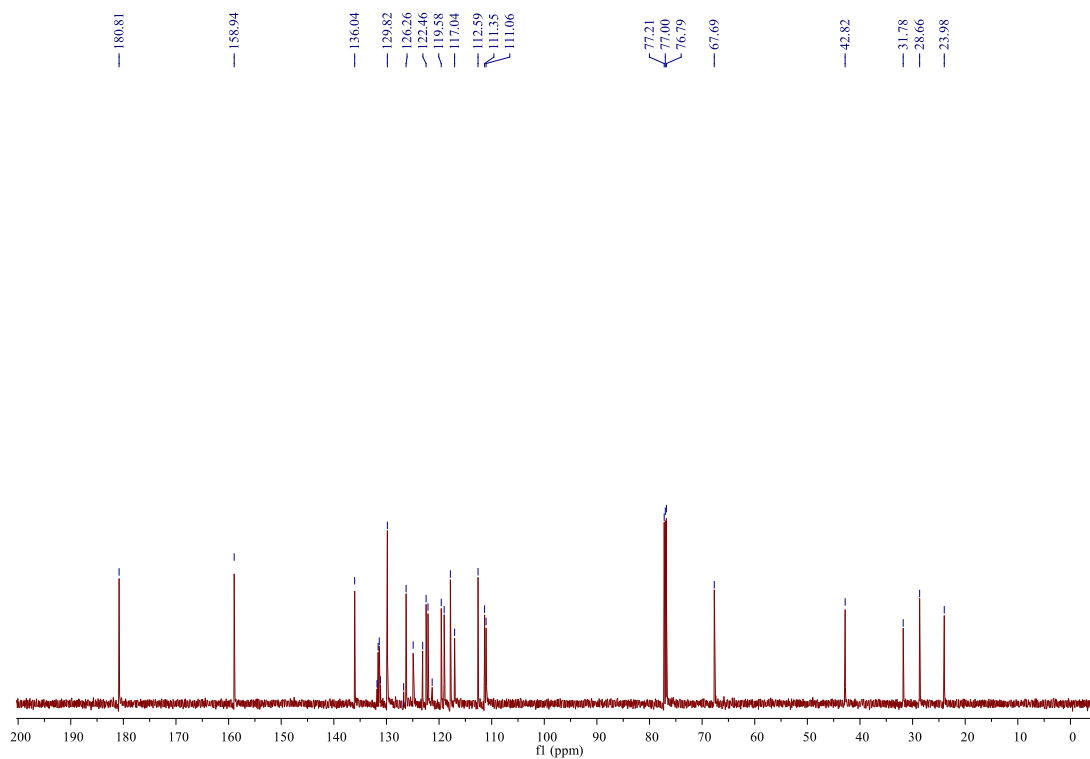 $^{13}\text{C}$  NMR spectrum of compound **10d**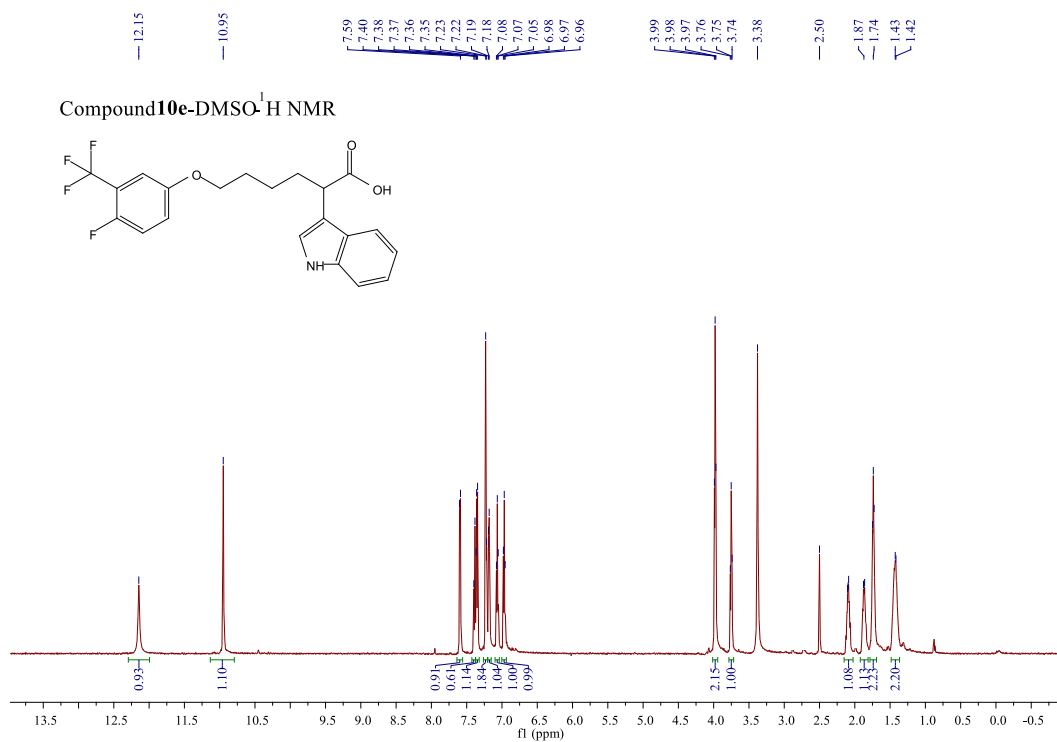Compound **10e**-DMSO- $d_6$   $^1\text{H}$  NMR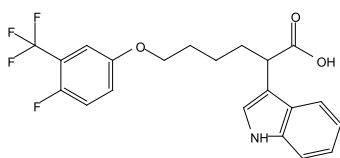 $^1\text{H}$  NMR spectrum of compound **10e**



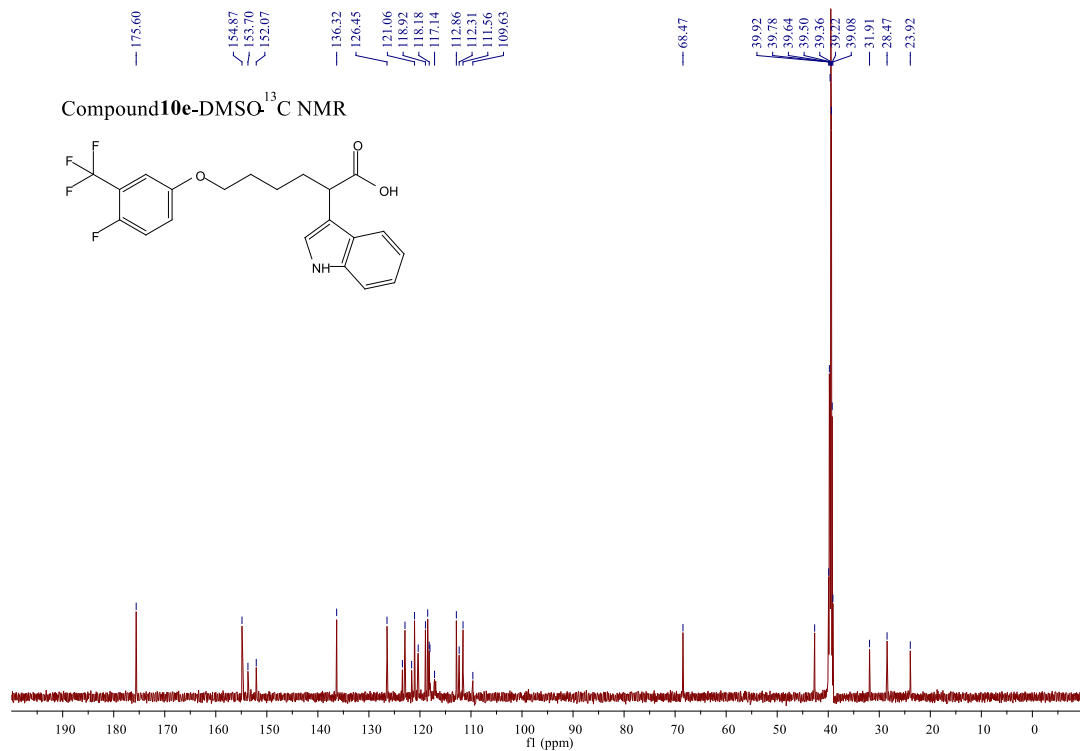

$^{13}\text{C}$  NMR spectrum of compound **10e**

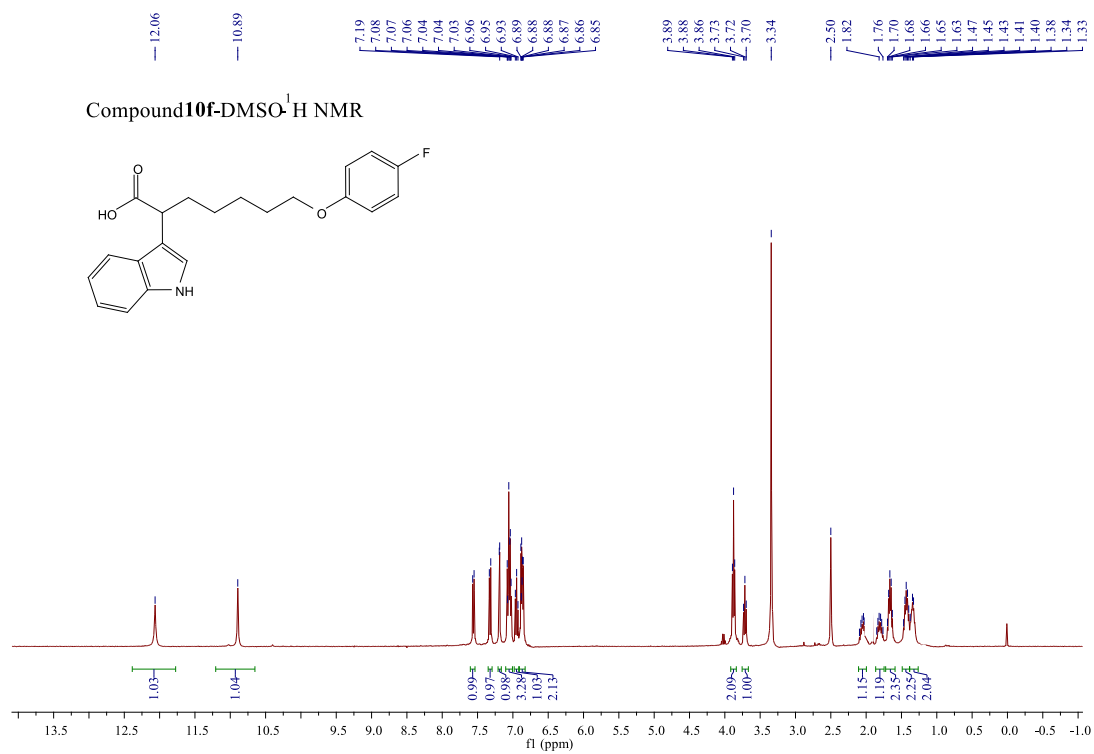

$^1\text{H}$  NMR spectrum of compound **10f**

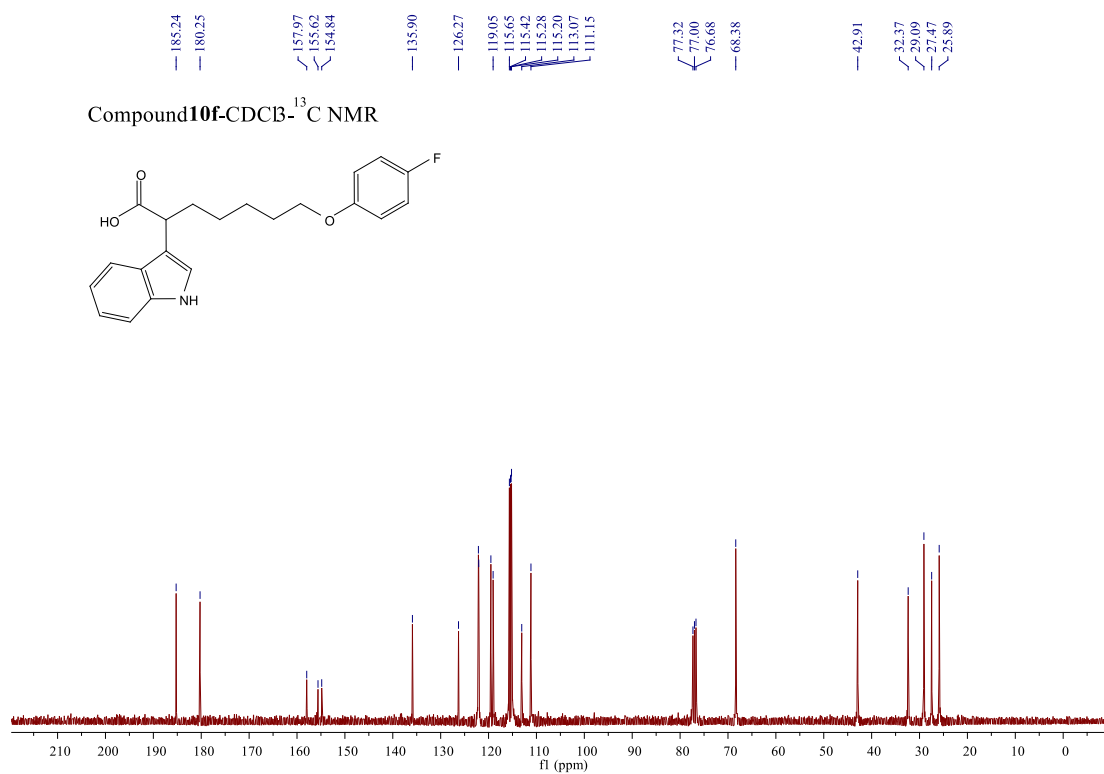<sup>13</sup>C NMR spectrum of compound **10f**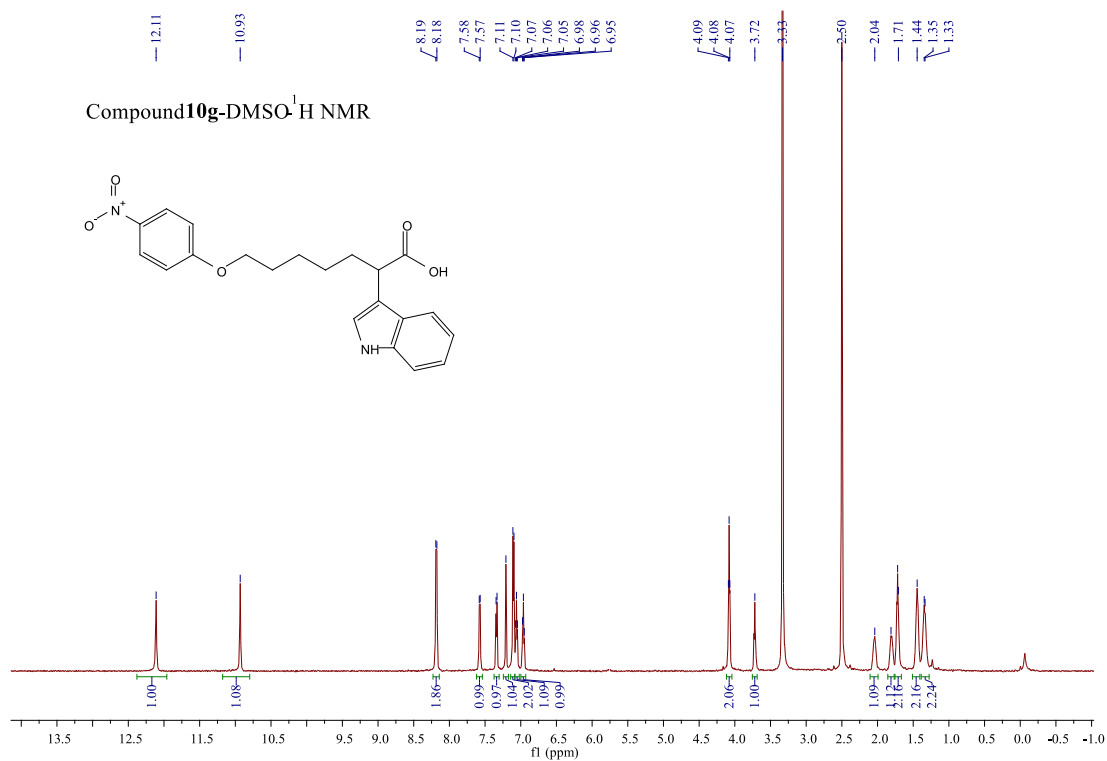<sup>1</sup>H NMR spectrum of compound **10g**

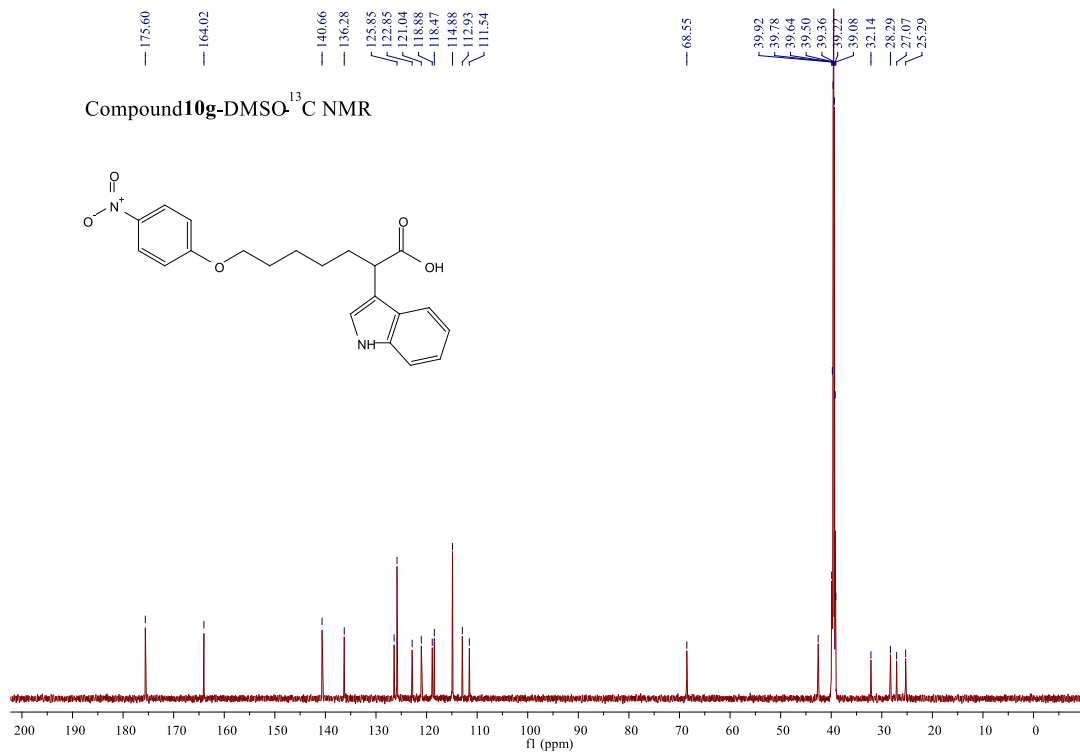

$^{13}\text{C}$  NMR spectrum of compound **10g**

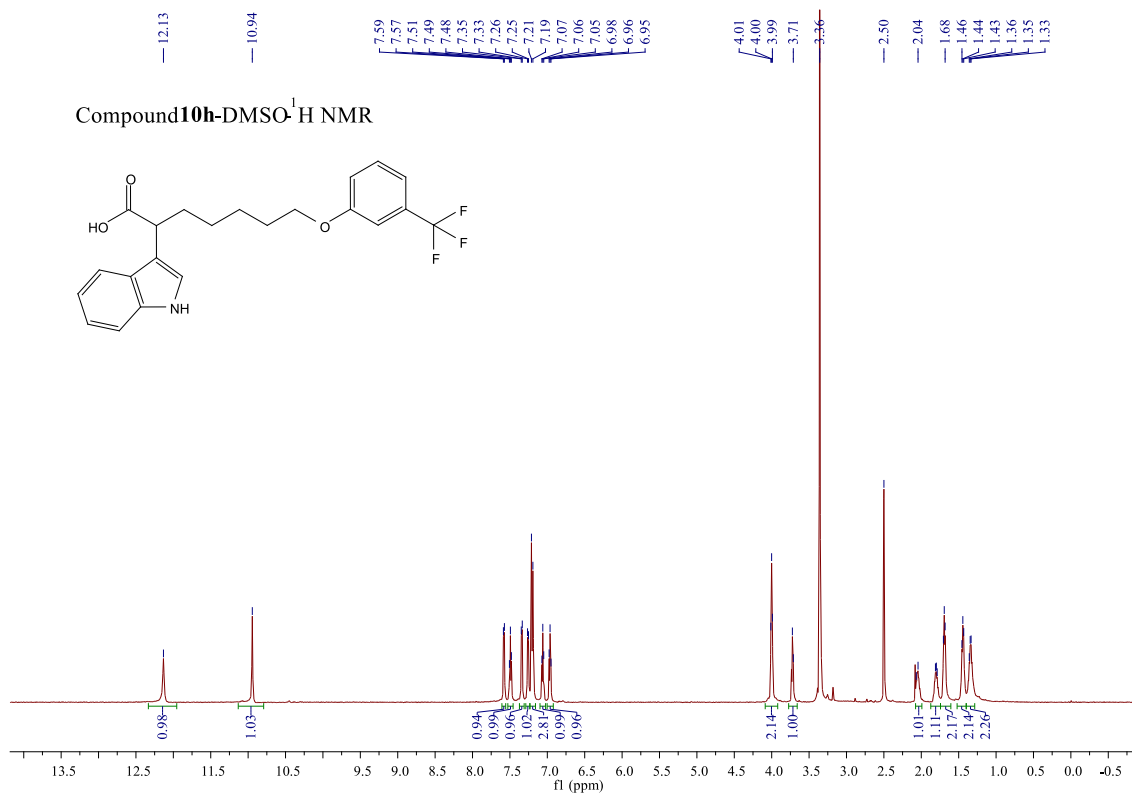

$^1\text{H}$  NMR spectrum of compound **10h**

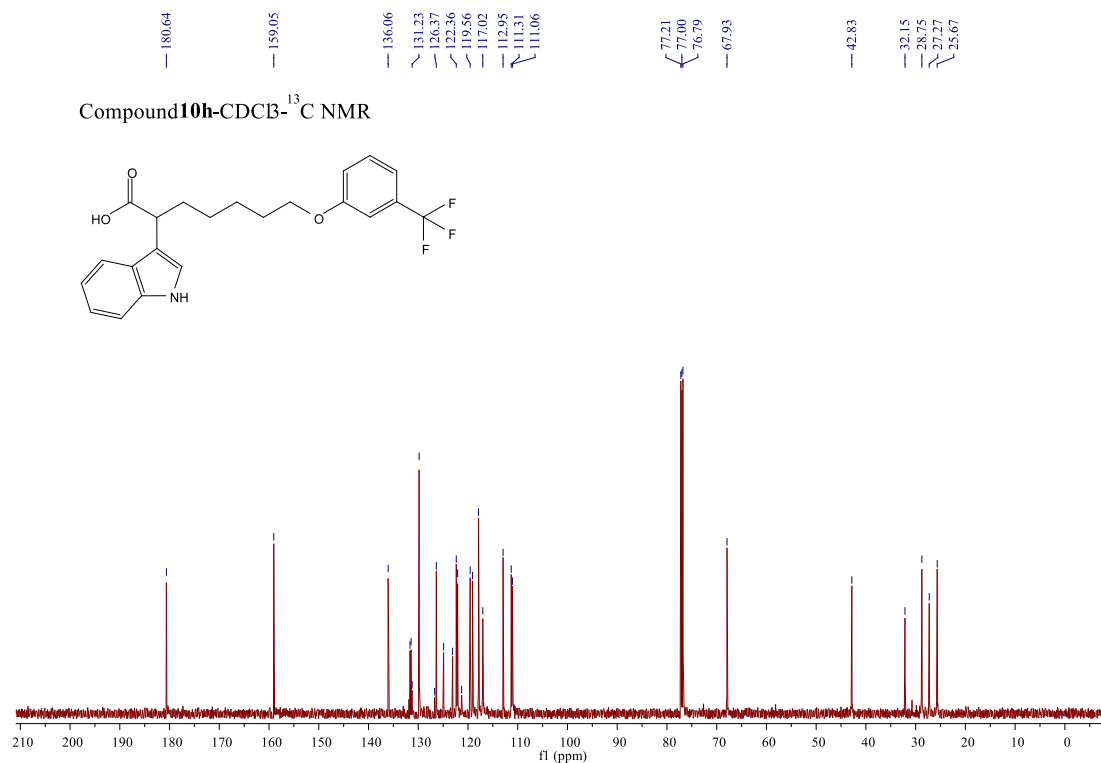<sup>13</sup>C NMR spectrum of compound **10h**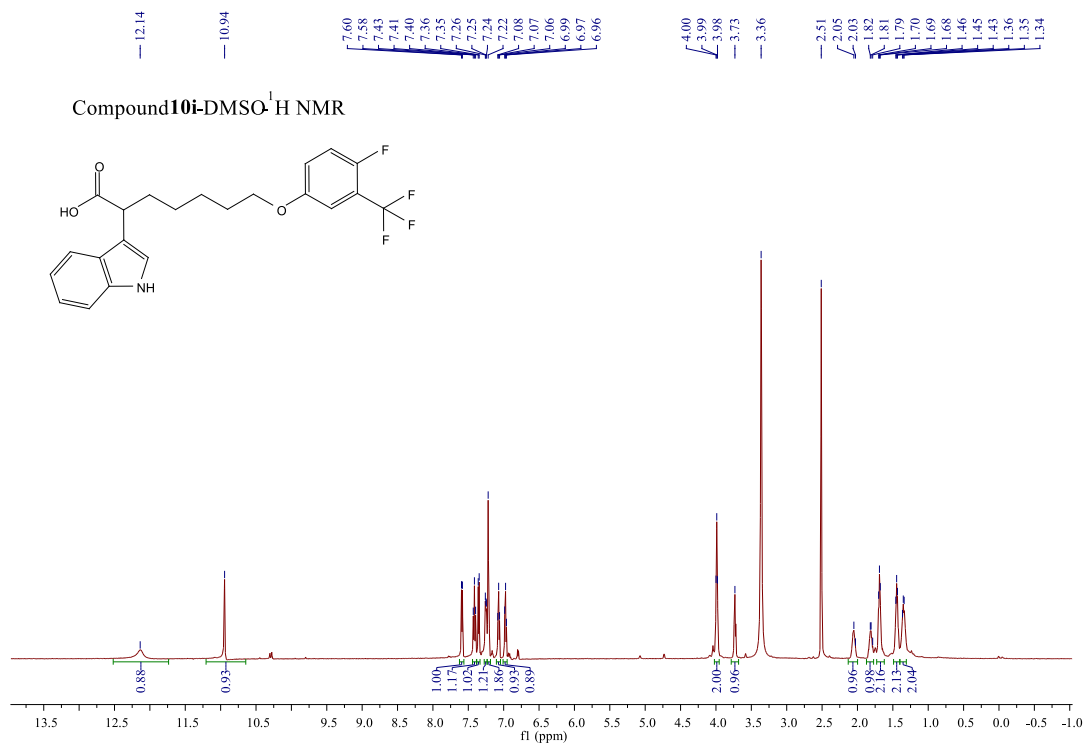<sup>1</sup>H NMR spectrum of compound **10i**

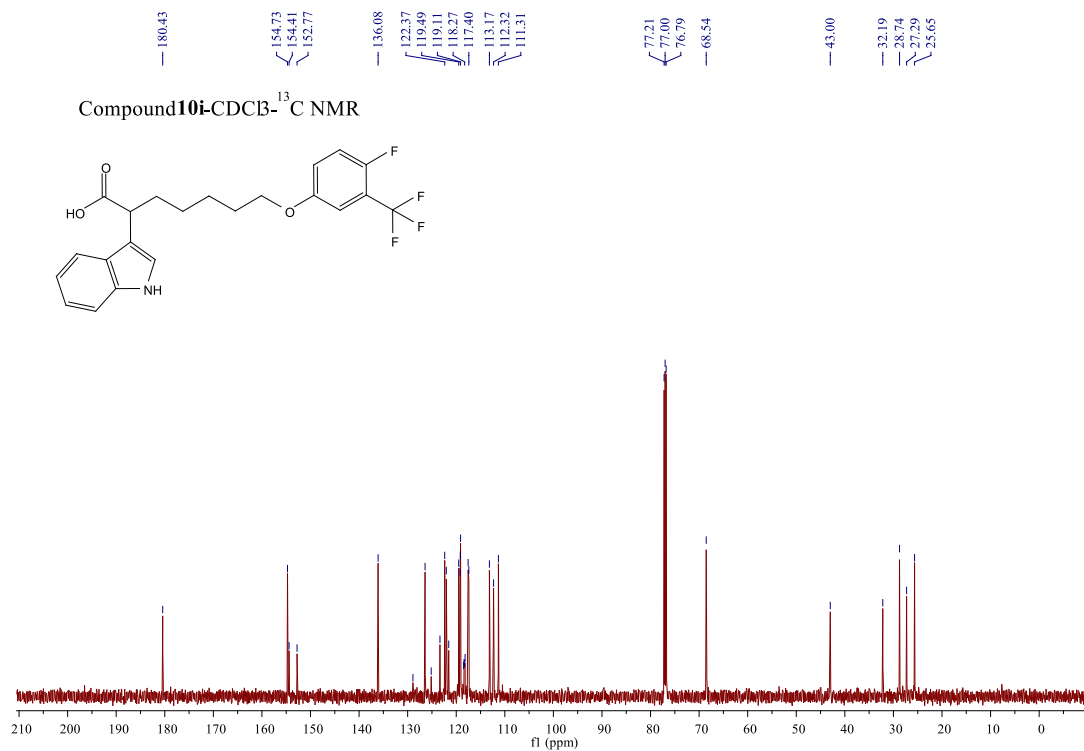

<sup>13</sup>C NMR spectrum of compound **10i**

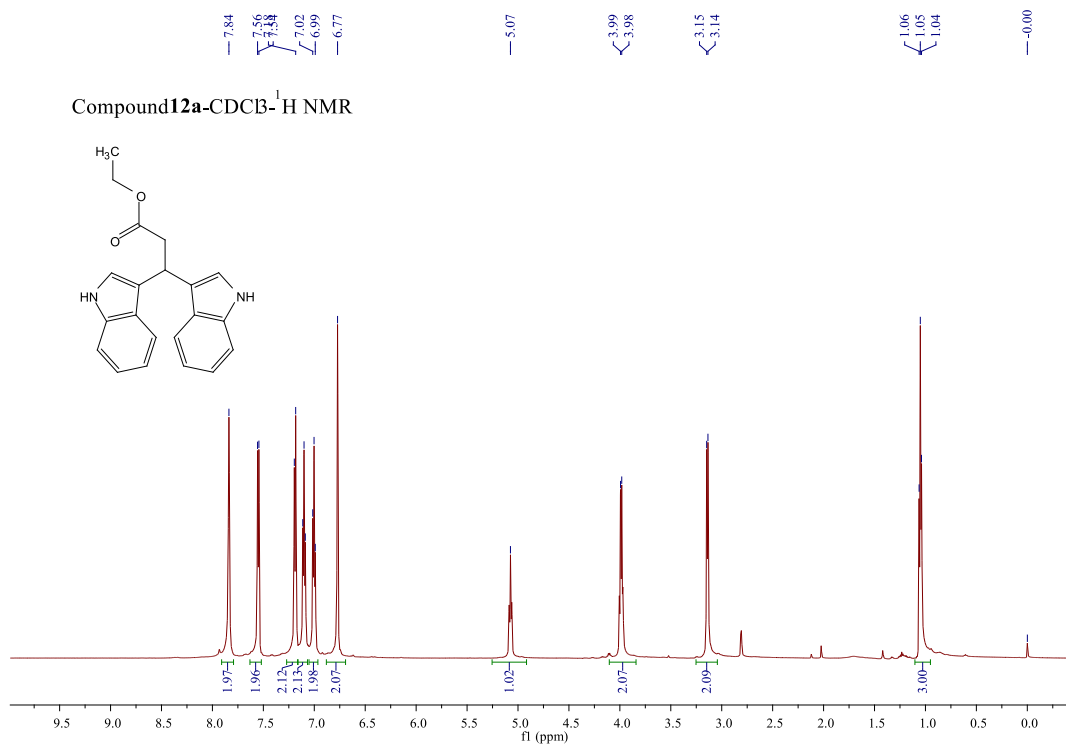

<sup>1</sup>H NMR spectrum of compound **12a**

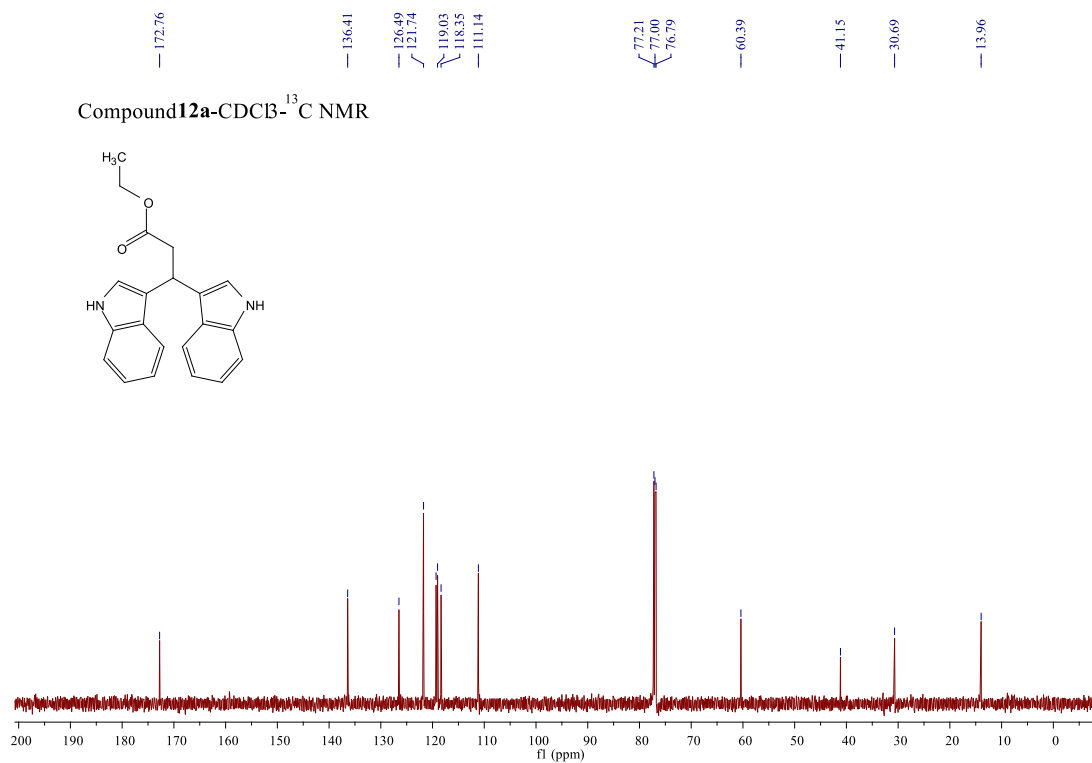 $^{13}\text{C}$  NMR spectrum of compound **12a**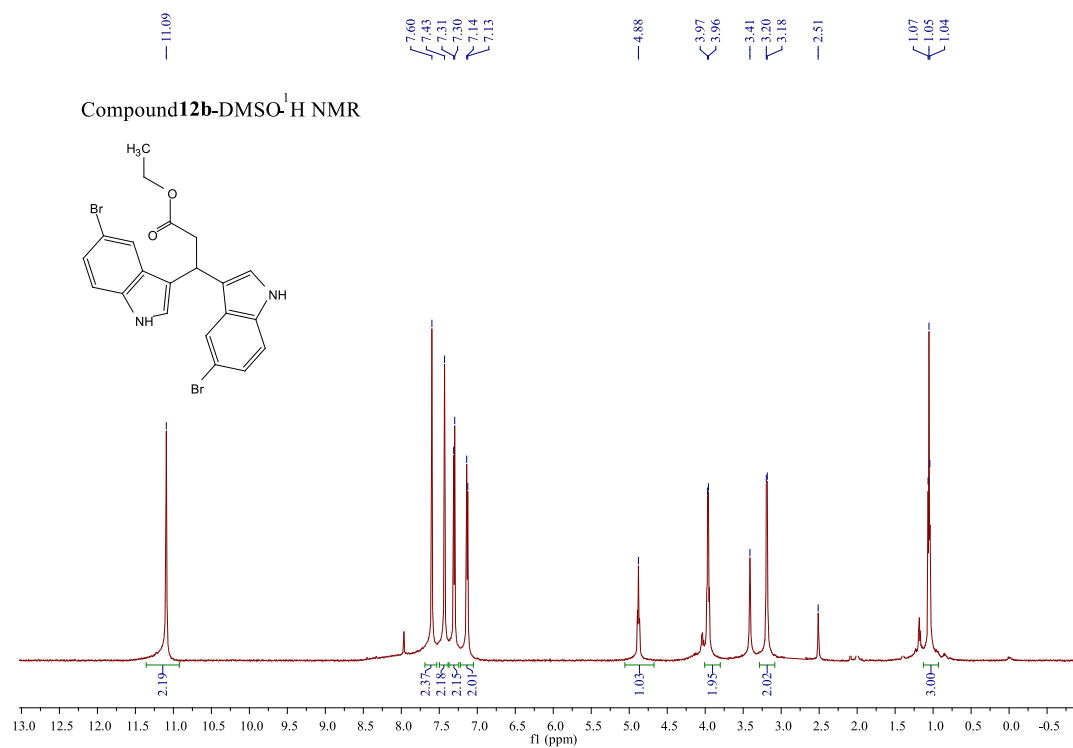 $^1\text{H}$  NMR spectrum of compound **12b**

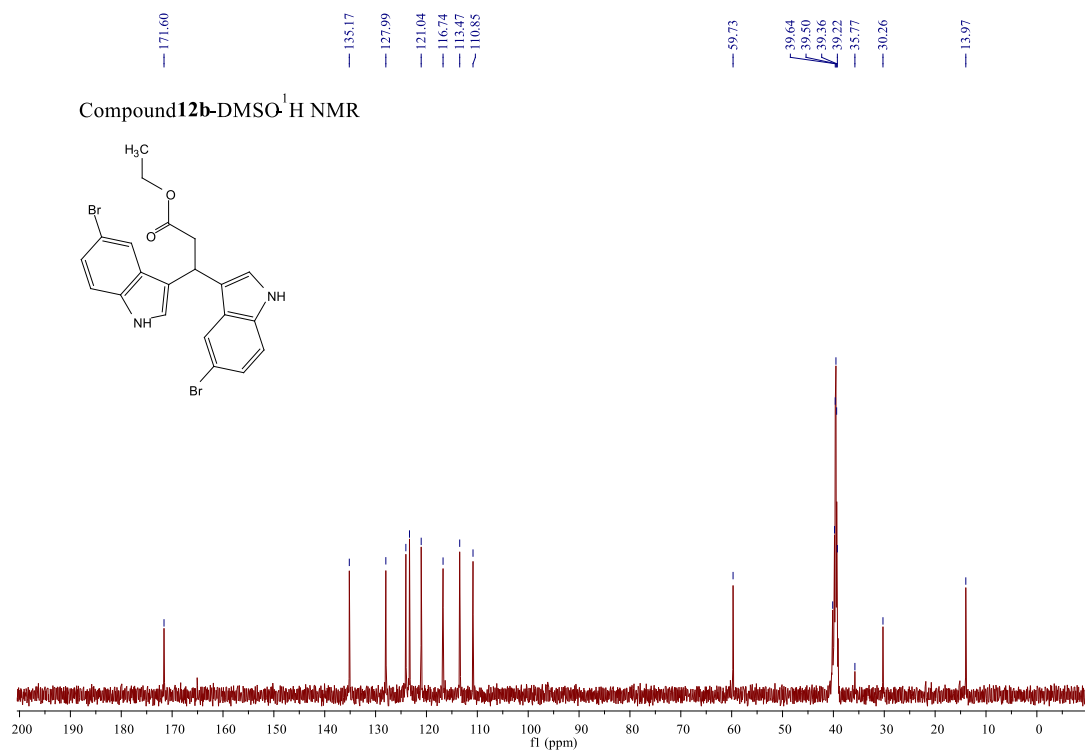

$^{13}\text{C}$  NMR spectrum of compound **12b**

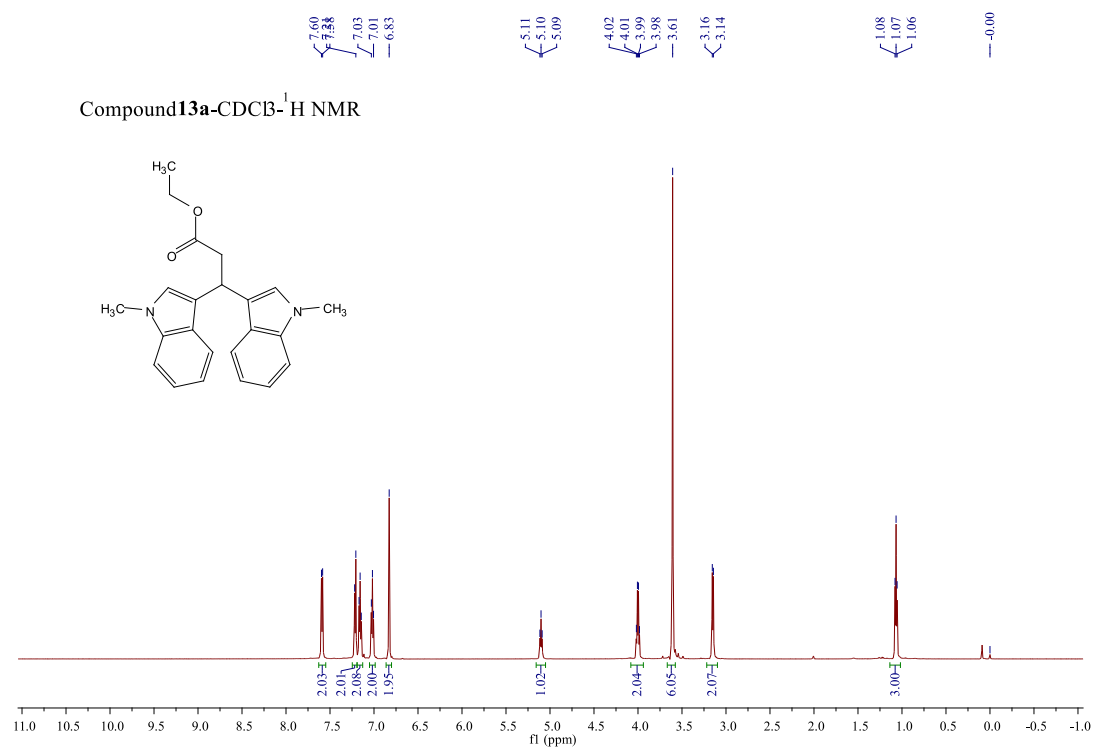

$^1\text{H}$  NMR spectrum of compound **13a**

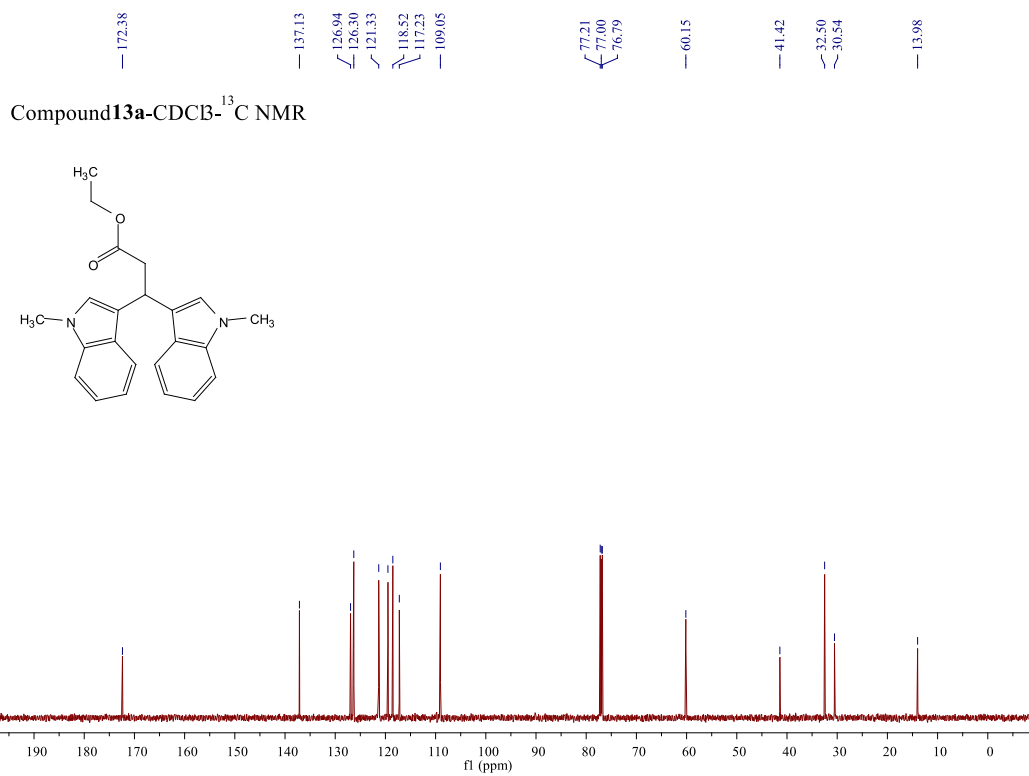<sup>13</sup>C NMR spectrum of compound **13a**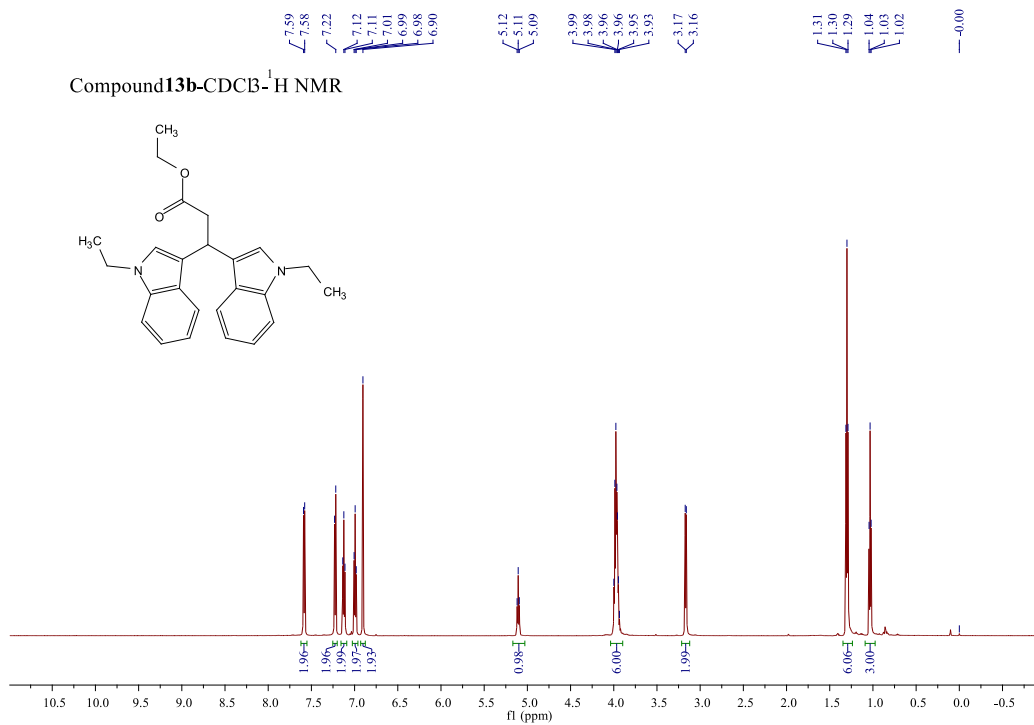<sup>1</sup>H NMR spectrum of compound **13b**



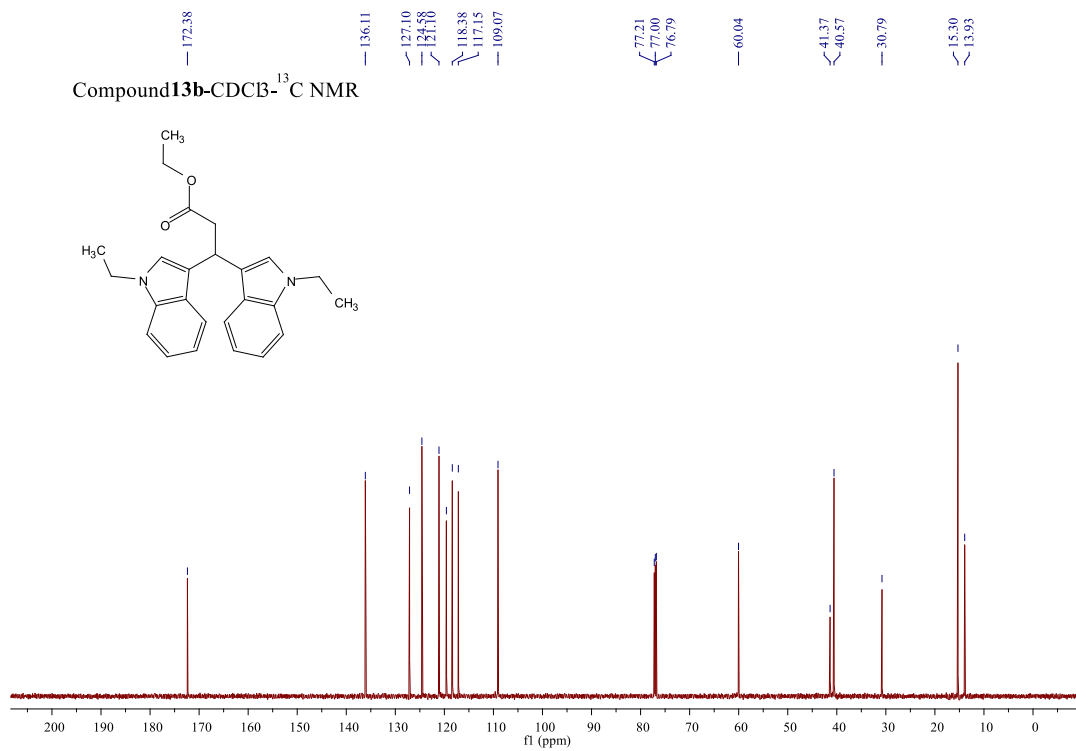

<sup>13</sup>C NMR spectrum of compound **13b**

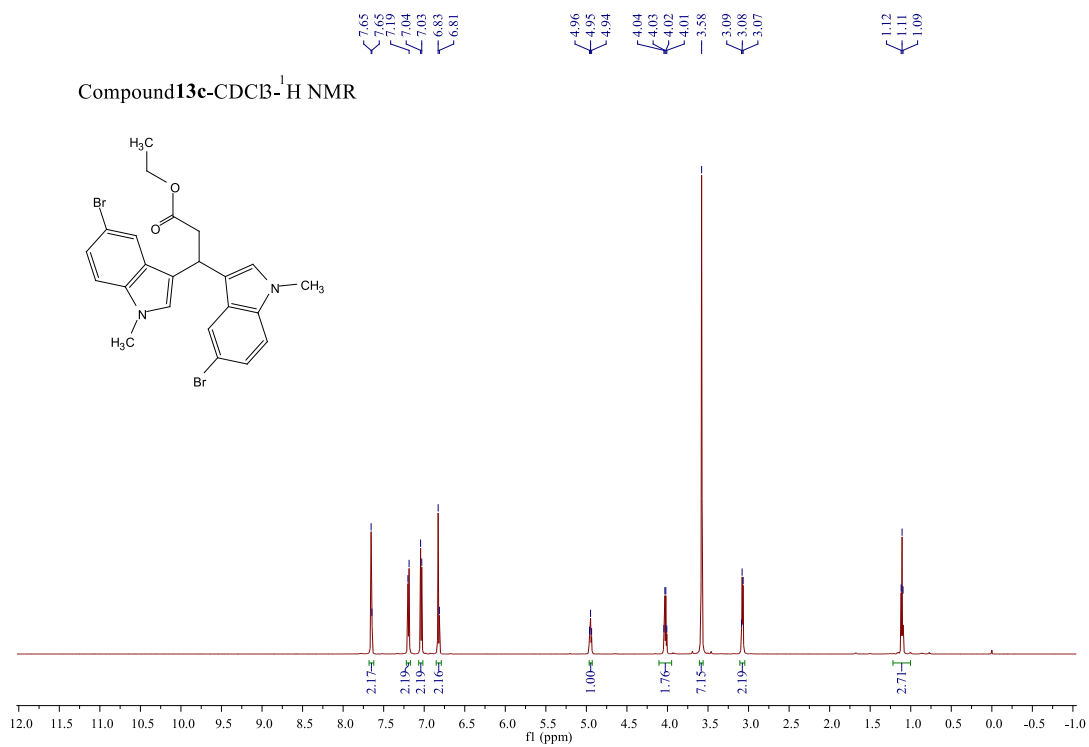

<sup>1</sup>H NMR spectrum of compound **13c**

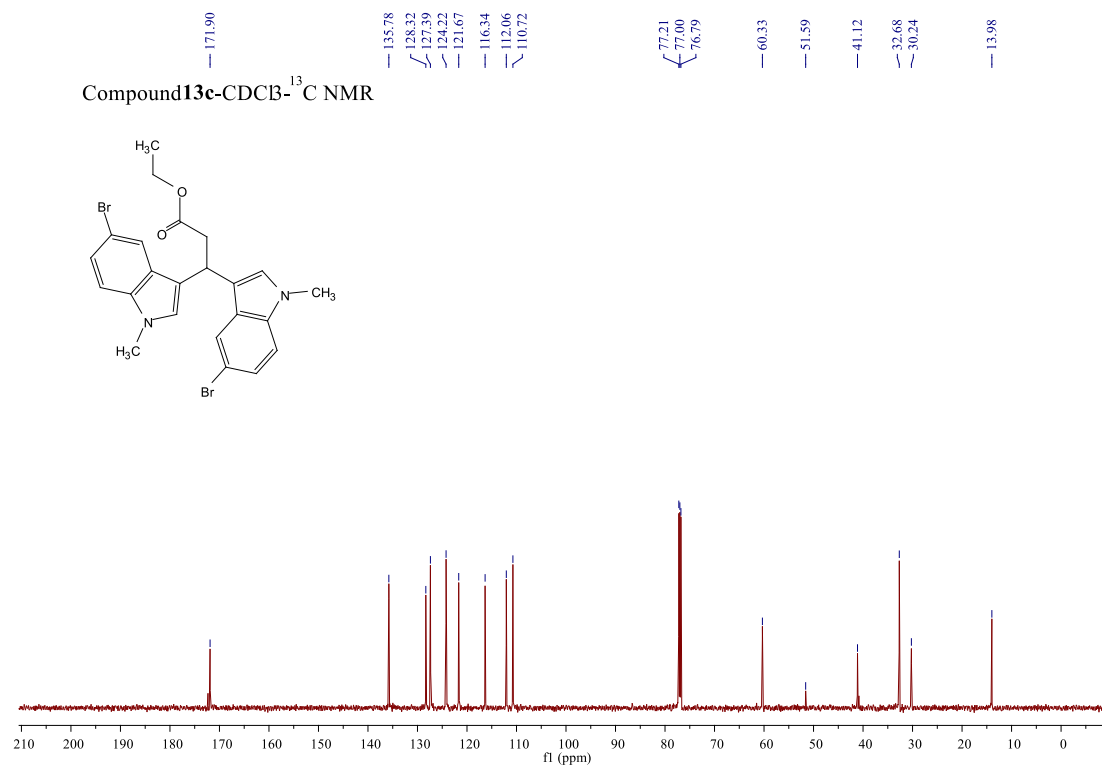<sup>13</sup>C NMR spectrum of compound **13c**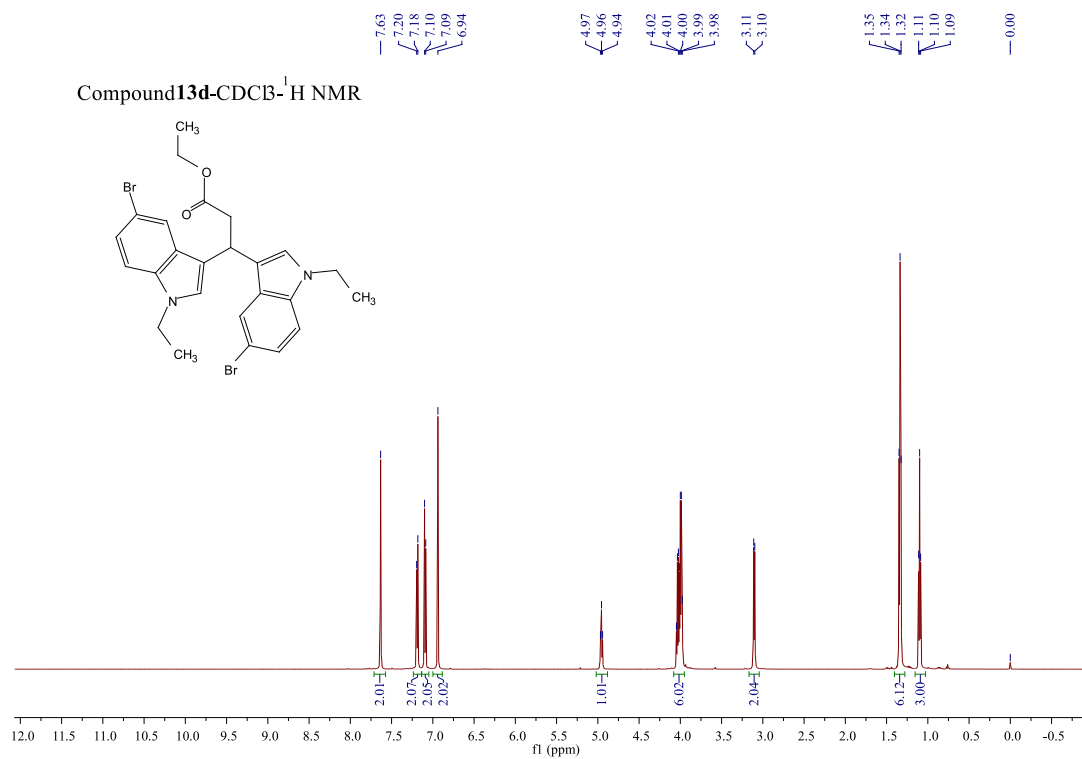<sup>1</sup>H NMR spectrum of compound **13d**

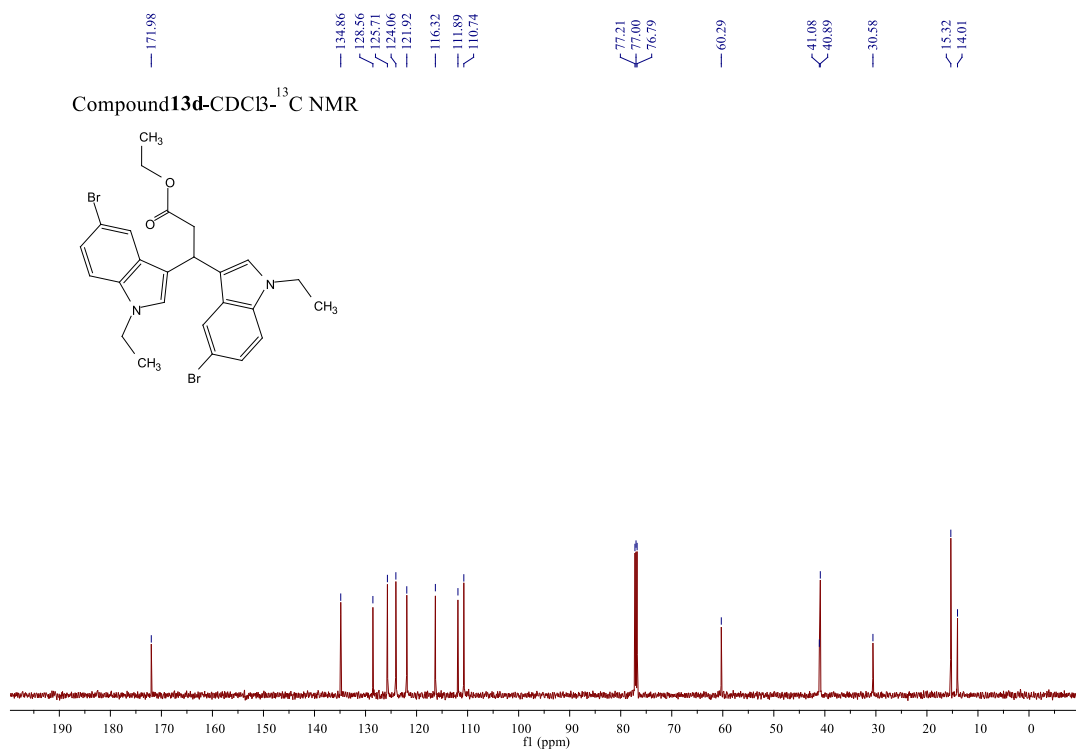

$^{13}\text{C}$  NMR spectrum of compound 13d

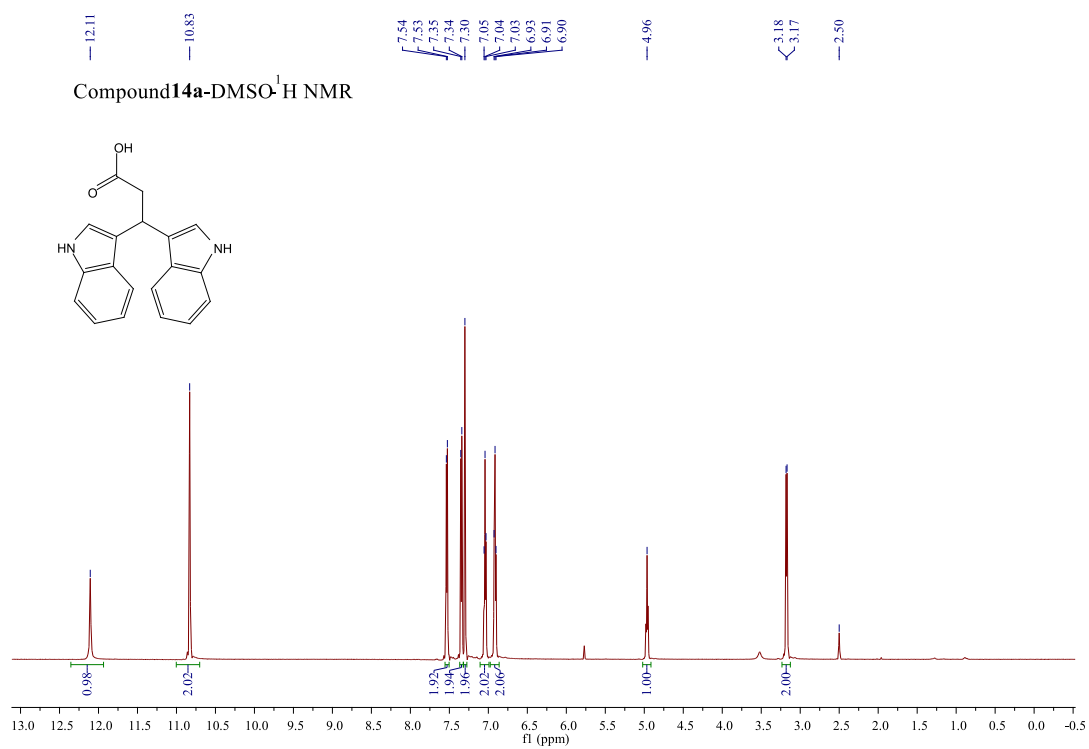

$^1\text{H}$  NMR spectrum of compound 14a

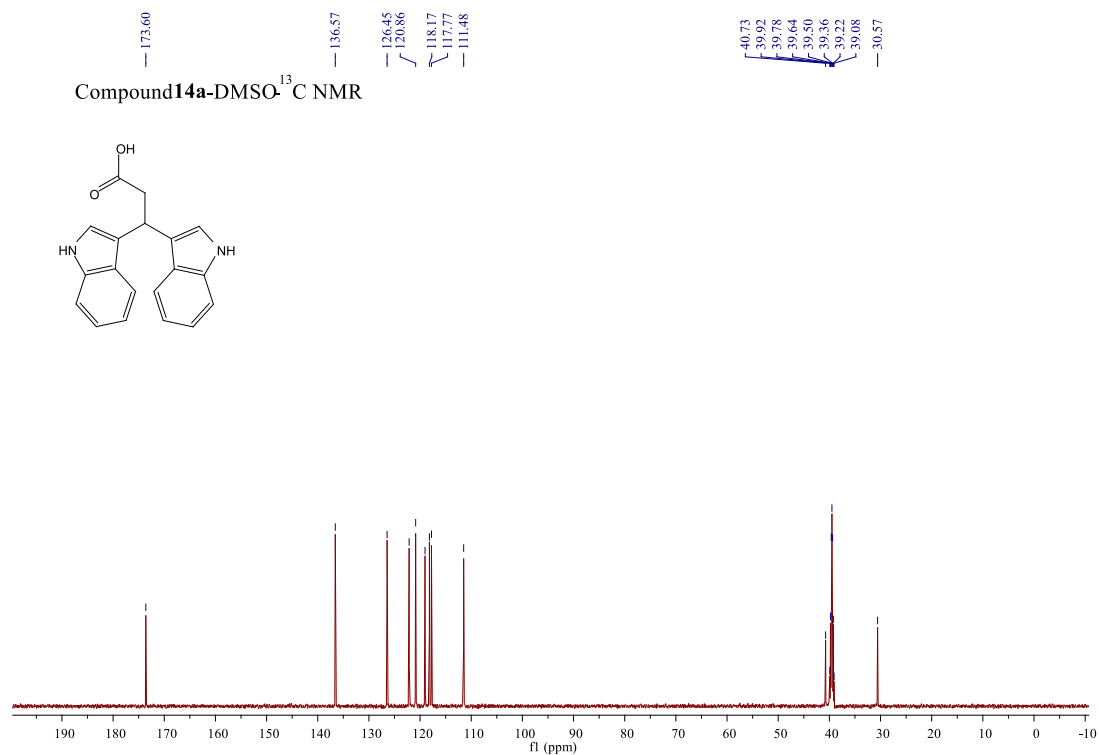 $^{13}\text{C}$  NMR spectrum of compound **14a**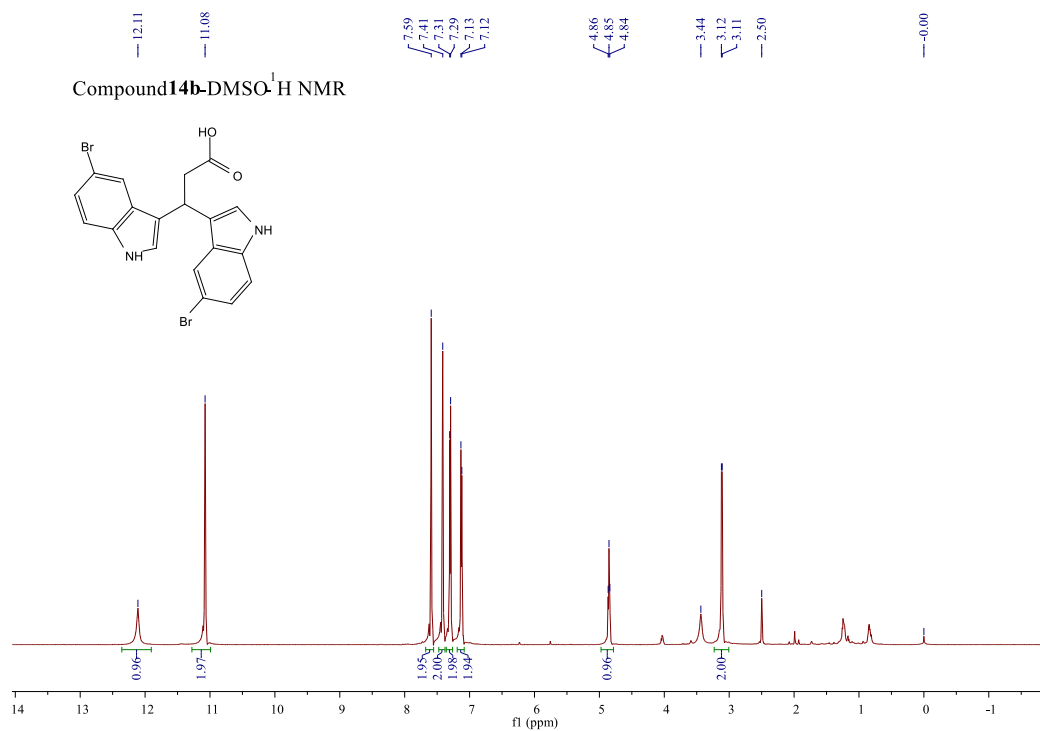 $^1\text{H}$  NMR spectrum of compound **14b**

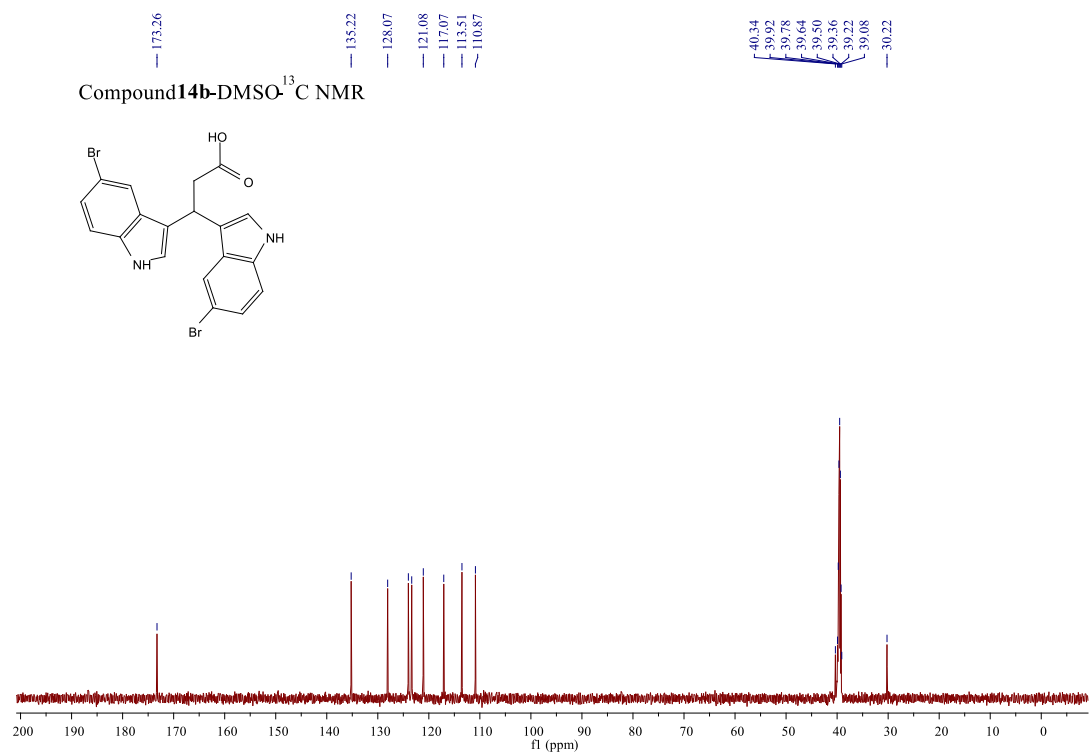

$^{13}\text{C}$  NMR spectrum of compound **14b**

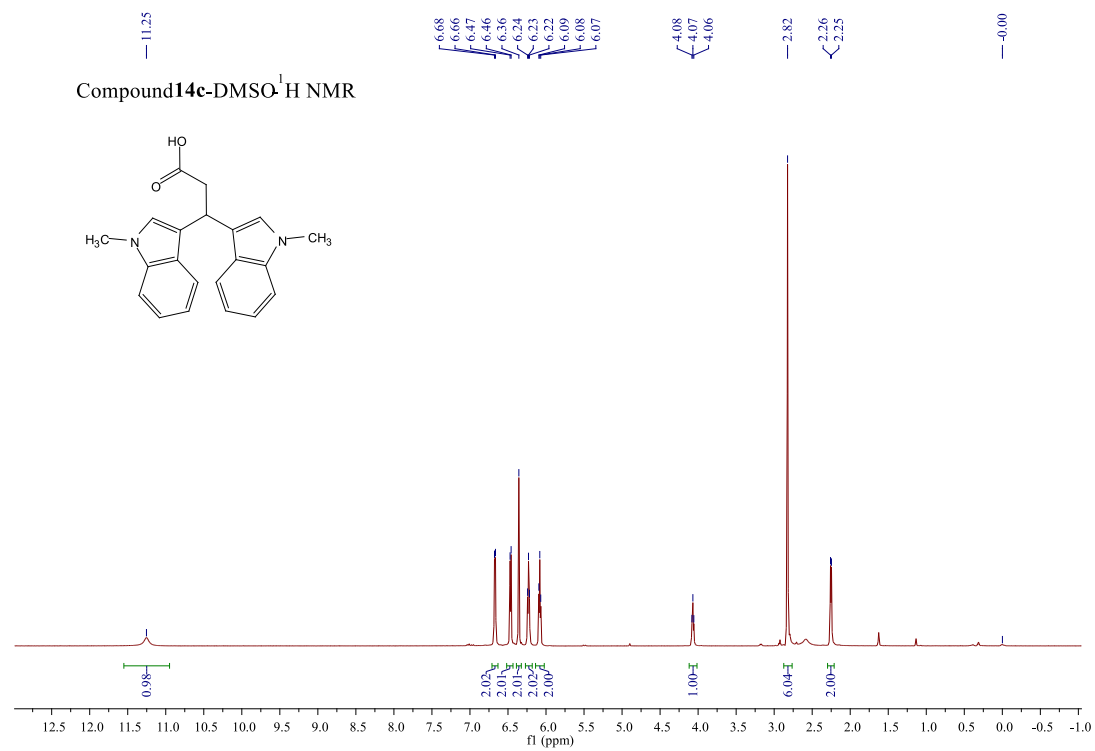

$^1\text{H}$  NMR spectrum of compound **14c**

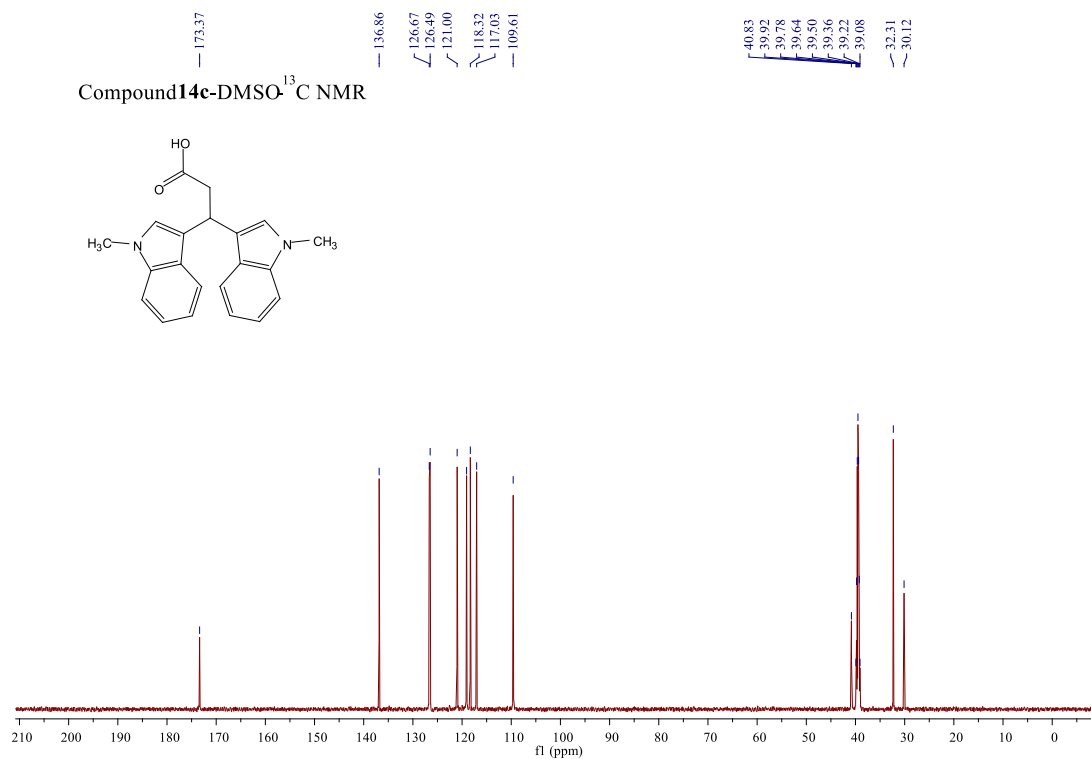 $^{13}\text{C}$  NMR spectrum of compound **14c**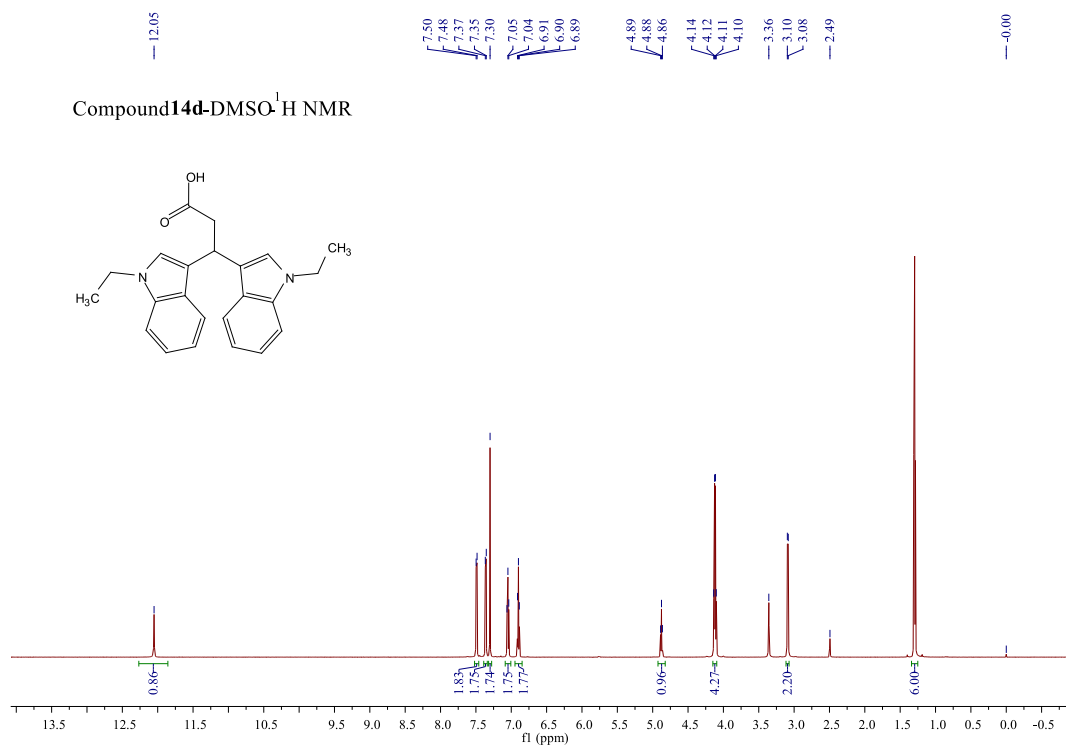 $^1\text{H}$  NMR spectrum of compound **14d**

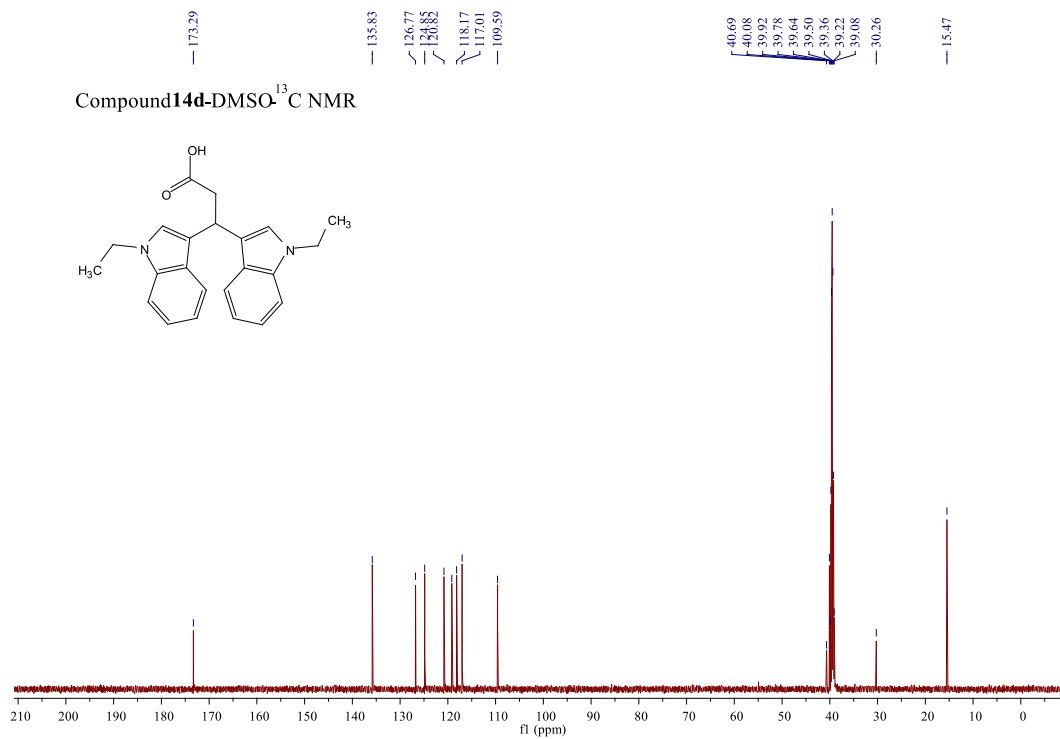

$^{13}\text{C}$  NMR spectrum of compound **14d**

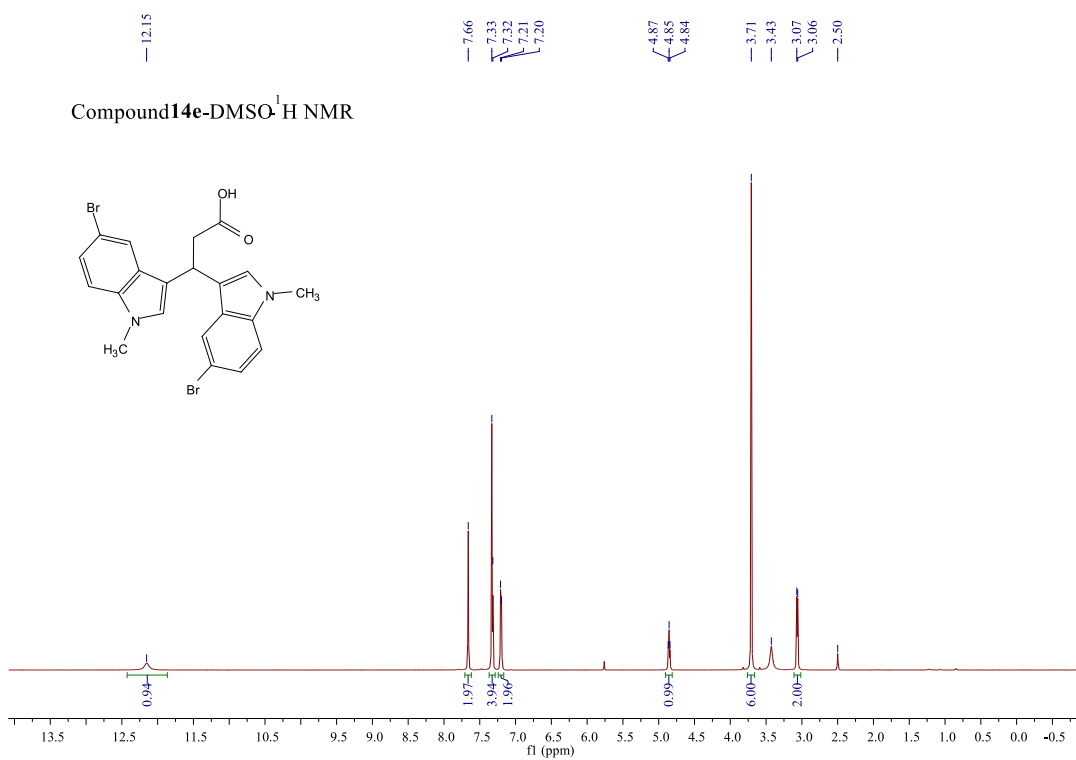

$^1\text{H}$  NMR spectrum of compound **14e**

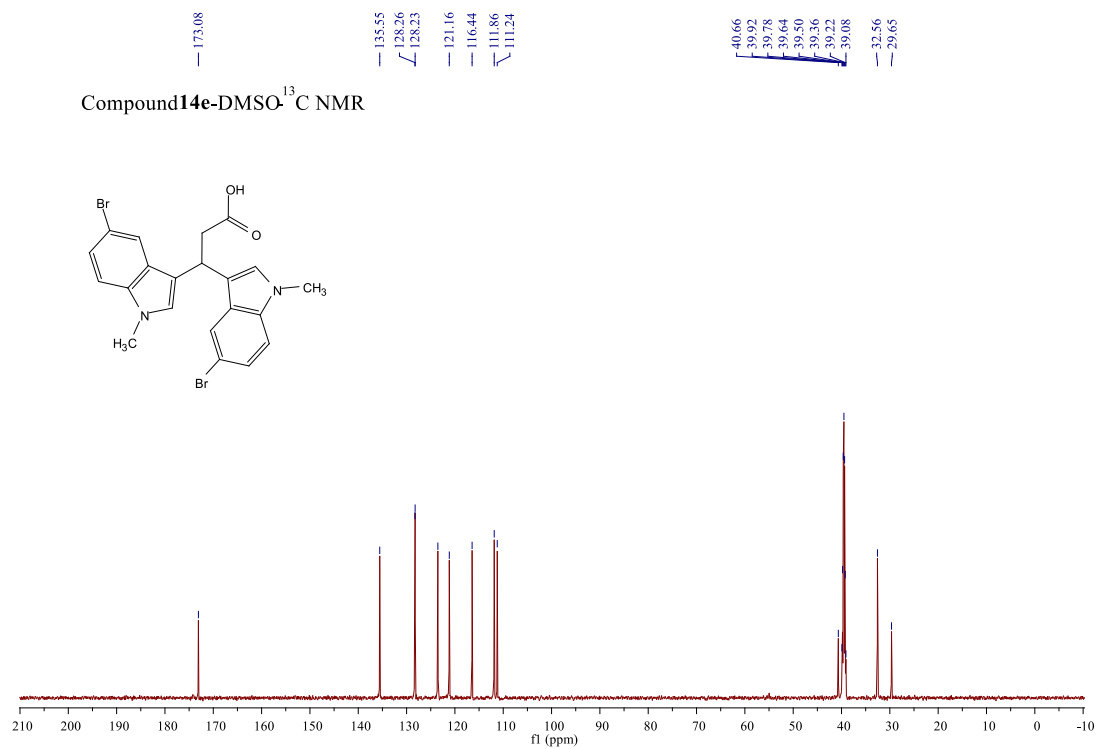 $^{13}\text{C}$  NMR spectrum of compound **14e**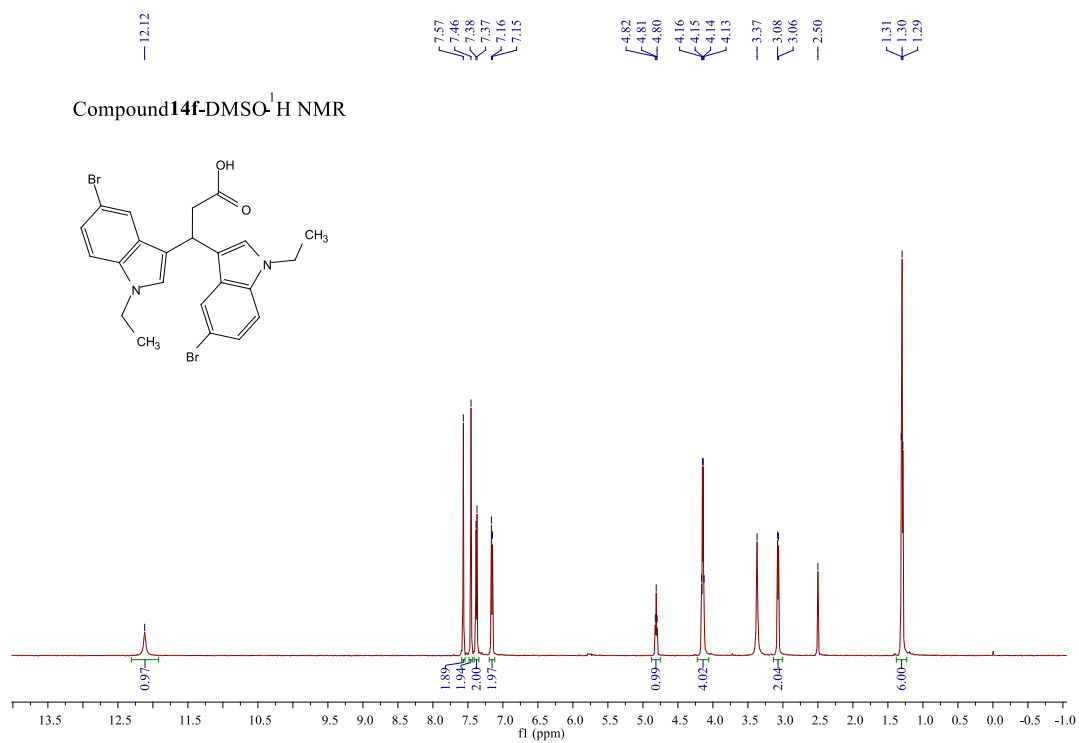 $^1\text{H}$  NMR spectrum of compound **14f**



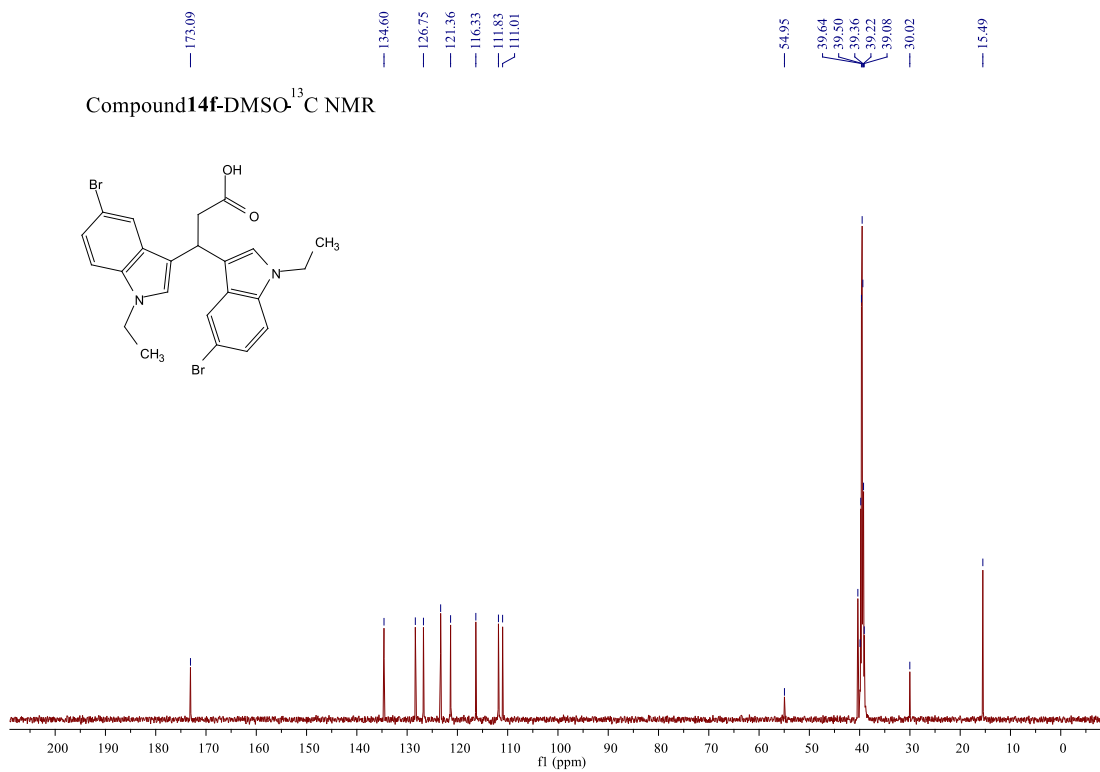

$^{13}\text{C}$  NMR spectrum of compound **14f**
